# For comparing phylogenetic diversity among communities, go ahead and use synthesis phylogenies

*Daijiang Li<sup>1</sup>, Lauren Trotta<sup>1</sup>, Hannah E. Marx<sup>2</sup>, Julie M. Allen<sup>3</sup>, Miao Sun<sup>3</sup>, Douglas  
E. Soltis<sup>3</sup>, Pamela S. Soltis<sup>3</sup>, Robert P. Guralnick<sup>3</sup>, and Benjamin Baiser<sup>1</sup>*

2018-07-16 11:18:34

<sup>1</sup>Department of Wildlife Ecology and Conservation, University of Florida, Gainesville, FL 32611,  
USA

<sup>2</sup>Department of Ecology and Evolutionary Biology, University of Arizona, PO Box 210088, Tucson,  
AZ 85721, USA

<sup>3</sup>Florida Museum of Natural History, University of Florida, Gainesville, FL 32611, USA

Email: [daijianglee@gmail.com](mailto:daijianglee@gmail.com) (Corresponding author, ORCID:

<http://orcid.org/0000-0002-0925-3421>)

Key words: alpha diversity, beta diversity, community phylogenetic structure, open tree of life,  
phylogenetic diversity, purpose-built phylogeny, synthesis tree.

**Running headline:** Phylogenetic diversity based on different trees

17 **Abstract:**

- 18 1. Should we build our own phylogenetic trees based on gene sequence data or can we simply  
19 use available synthesis phylogenies? This is a fundamental question that any study  
20 involving a phylogenetic framework must face at the beginning of the project. Building a  
21 phylogeny from gene sequence data (purpose-built phylogeny) requires more effort and  
22 expertise than subsetting an already available phylogeny (synthesis-based phylogeny). If  
23 phylogenetic diversity estimates based on these two types of phylogenies are highly  
24 correlated, using readily available synthesis-based phylogenies is justified for comparing  
25 phylogenetic diversity among communities. However, a comparison of how these two  
26 approaches to building phylogenetic trees influence the calculation of phylogenetic diversity  
27 has not been explicitly tested.
- 28 2. We generated three purpose-built phylogenies and their corresponding synthesis-based trees  
29 (two from Phylomatic and one from the Open Tree of Life). We then utilized a simulation  
30 approach to generate 1000 communities with a fixed number of species per site and  
31 compared the effects of different trees on estimates of phylogenetic alpha and beta diversity  
32 using Spearman's rank-based correlation and linear mixed models.
- 33 3. Synthesis-based phylogenies generally overestimated phylogenetic diversity when compared  
34 to purpose-built ones. However, their resulting measures of phylogenetic diversity were  
35 highly correlated (Spearman's  $r > 0.8$  in most cases). Mean pairwise distance (both alpha and  
36 beta version) is the most robust index among the phylogenetic diversity indices we tested.  
37 Measures of phylogenetic diversity based on the Open Tree of Life showed the highest  
38 correlation with measures based on the purpose-built phylogenies.
- 39 4. For comparing phylogenetic diversity among communities, our results justify taking  
40 advantage of recently developed and continuously improving synthesis trees such as the  
41 Open Tree of Life.

## 42 **Introduction**

43 Phylogenies describe the evolutionary history of species and provide important tools to study  
44 ecological and evolutionary questions (Baum & Smith, 2012). Recently, phylogenies have been  
45 used to better understand patterns of community assembly. The phylogenetic structure of  
46 ecological communities can lend insight into the processes by which local communities assemble  
47 from regional species pools (Webb, Ackerly, McPeck, & Donoghue, 2002). For example, if closely  
48 related species are more likely to co-occur in the same habitats, we might suspect that these  
49 species share traits that allow them to have a positive growth rate under the environmental  
50 conditions in these habitats. To test whether closely related species are more or less likely to  
51 co-occur, one common approach is to calculate the phylogenetic diversity of communities and then  
52 compare the observed phylogenetic diversity with those expected by chance through different null  
53 models. There is a growing body of literature using this community phylogenetic approach,  
54 documenting the phylogenetic structure of ecological communities across taxa and scales (Webb et  
55 al., 2002; Cavender-Bares, Keen, & Miles, 2006; Helmus, Savage, Diebel, Maxted, & Ives, 2007;  
56 Vamosi, Heard, Vamosi, & Webb, 2009; Cardillo, 2011; Smith, Hallwachs, & Janzen, 2014; Li, Ives, &  
57 Waller, 2017; Marx et al., 2017).

58 As an important facet of biodiversity, phylogenetic diversity also plays a crucial role in  
59 conservation biology by complementing more traditional taxonomic measures of biodiversity  
60 (e.g. species richness). For example, two communities can have the same number of species but  
61 differ drastically in their phylogenetic diversity depending on relatedness of the constituent  
62 species. The community with higher phylogenetic diversity, representing taxa more distantly  
63 related to each other, is expected to be more stable and productive given its greater evolutionary  
64 potential to adapt to changing environmental conditions (Forest et al., 2007; Maherali &  
65 Klironomos, 2007; Lavergne, Mouquet, Thuiller, & Ronce, 2010). Therefore, all else being equal, a  
66 community with higher phylogenetic diversity should have higher conservation priority.

67 The information gained from phylogenetic diversity analyses are only as good as the species  
68 composition data and the phylogenies from which they are generated. In this manuscript, we  
69 explore how tree generation affects these phylogenetic diversity metrics. Generally, ecologists use  
70 two common approaches to build phylogenies for community phylogenetic analyses. The first  
71 approach is to generate their own purpose-built phylogenies based on gene sequence data. The  
72 second approach is to construct phylogenies based on available synthesis trees using software  
73 programs such as Phylomatic (Webb & Donoghue, 2005).

74 Generating a purpose-built tree requires more effort and expertise than subsetting a well-developed  
75 phylogeny. Generally, purpose-built trees are constructed by first assembling new sequence data  
76 and then combining those data with data already available on GenBank. The first step requires  
77 gathering tissue for taxa of interest either from field or museum collections, extracting DNA from  
78 these tissue samples, and then identifying, amplifying, and sequencing appropriate loci. The gene  
79 regions selected are typically based on the taxa of interest and discipline-accepted standards.  
80 Resulting sequences are aligned in programs like MUSCLE (Edgar, 2004). Sequences are also  
81 commonly sourced entirely or as an addition to sequence data already in databases like GenBank  
82 with the help of computational pipelines such as PHLAWD (Smith, Beaulieu, & Donoghue, 2009).  
83 Appropriate models of evolution for phylogenetic estimation are determined using programs like  
84 PartitionFinder (Lanfear, Calcott, Ho, & Guindon, 2012) where each gene region in the  
85 concatenated sequences can be treated separately. The most appropriate models of nucleotide  
86 evolution are used to estimate phylogenies in Maximum Likelihood (ML) and/or Bayesian  
87 Inference (BI) frameworks in programs like RAxML (Stamatakis, 2014), MrBayes (Ronquist &  
88 Huelsenbeck, 2003), and BEAST (Drummond & Rambaut, 2007). Depending on the desired  
89 application, it may be necessary to impose topological constraints to ease phylogenetic inference  
90 or fossil constraints to scale branch lengths to time. Statistics for clade support are calculated using  
91 bootstrap or jack-knifing techniques in an ML framework, and posterior probabilities in BI.  
92 Despite the fact that multiple software programs are available to help automate these processes  
93 (e.g. phyloGenerator (Pearse & Purvis, 2013), SUPERSMART (Antonelli et al., 2017)), many

94 decisions at different steps must be made based on expert knowledge (e.g. Which genes to select?  
95 How to select models? Which software program to use? How to estimate divergence time?).  
96 Because of the effort, expertise, and cost required to generate purpose-built phylogenies, many  
97 community phylogenetic studies use the second approach: deriving phylogenies from available  
98 synthesis trees. Over the past few decades, tremendous advances in computational tools and  
99 increasingly available genetic sequence data have led to vastly improved synthesis trees for plants  
100 (Zanne et al., 2014; Smith & Brown, 2018), birds (Jetz, Thomas, Joy, Hartmann, & Mooers, 2012),  
101 fishes (Rabosky et al., 2013), and mammals (Bininda-Emonds et al., 2007; Fritz, Bininda-Emonds, &  
102 Purvis, 2009). Such advances in phylogenetics have facilitated the synthesis of all available  
103 information to make a comprehensive tree of life on Earth (Hinchliff et al., 2015). With these  
104 available synthesis trees and software programs such as Phylomatic (Webb & Donoghue, 2005),  
105 ecologists can derive phylogenies for the species or communities they are interested in with less  
106 effort and limited cost. When different studies use the same synthesis tree to derive their  
107 phylogenies, their phylogenetic diversity results are comparable. This may not be the case if they  
108 use purpose-built phylogenies. In addition, these approaches may avoid some issues when  
109 generating phylogenies from sequence data such as taxon sampling effects (Park, Worthington, &  
110 Xi, 2018). However, the tractability of phylogenies based on synthesis trees comes with the cost of  
111 decreased resolution (e.g. increase in polytomies) of the resulting phylogenies compared with  
112 purpose-built ones; such trees also have taxonomic gaps, which are often filled using existing  
113 classifications to become comprehensive. These polytomies and unresolved nodes are known to  
114 affect measures of phylogenetic diversity and dispersion, particularly for very large phylogenies  
115 with poorly resolved basal lineages (Swenson, 2009).

116 Previous studies have demonstrated that most phylogenetic diversity metrics are robust to  
117 terminal polytomies (Swenson, 2009; Patrick & Stevens, 2014; Boyle & Adamowicz, 2015). These  
118 studies, however, used simulated phylogenies or compared different posterior purpose-built  
119 phylogenies. Therefore, they provided little practical advice about selecting between purpose-built

120 and synthesis-based phylogenies for ecological studies. In this study, we compared phylogenetic  
121 diversity metrics calculated from purpose-built phylogenies and corresponding phylogenies  
122 derived from three commonly used synthesis trees. Our aim is to quantify the influence of the tree  
123 construction techniques on common measures of phylogenetic diversity. We found that  
124 phylogenies derived from synthesis trees generally overestimate phylogenetic diversity but are  
125 highly correlated with metrics derived from the purpose-built phylogenies. Therefore, when  
126 calculating and comparing phylogenetic diversity among communities, phylogenies based on  
127 synthesis trees may be satisfactory.

## 128 **Materials and Methods**

### 129 **Purpose-built phylogenies**

130 We collected three “purpose-built” phylogenies from published and unpublished sources. The first  
131 purpose-built phylogeny is for 540 plant taxa in the globally critically imperiled pine rockland  
132 ecosystem in South Florida, USA (Trotta et al., 2018). The second phylogeny consists of 1,064 alpine  
133 plant taxa in France (Marx et al., 2017). The third purpose-built phylogeny has 1,548 plant species  
134 with distributions in Florida, USA (Allen et al. in review). All three phylogenies were estimated  
135 from sequence data and were time-calibrated (i.e. chronograms). When using time-calibrated  
136 phylogenies, phylogenetic diversity measures the amount of evolution in time-units, and this is the  
137 measure we focus on here. For details about phylogeny building processes, see Appendix 1.

### 138 **Commonly available phylogenies**

139 For each of the three purpose-built phylogenies, we generated four phylogenies based on different  
140 synthesis phylogenies with which to compare phylogenetic alpha and beta diversity. The first two  
141 were generated using Phylomatic v4.2 (Webb & Donoghue, 2005) using two different backbone

142 trees: R20120829 (APG III) and zanne2014 (Zanne et al., 2014). We call the first phylogeny  
143 tree\_apg and the second one tree\_zanne. The phylogeny tree\_zanne has branch lengths  
144 because the backbone tree zanne2014 was constructed from seven gene regions for >32k plant  
145 species and was time-calibrated using ‘congruification’ (Eastman, Harmon, & Tank, 2013).  
146 However, the phylogeny tree\_apg has no branch lengths. To add branch lengths, we used the  
147 bladj algorithm in Phylocom (Webb, Ackerly, & Kembel, 2008) and an updated set of the  
148 minimum node ages given by Wikström, Savolainen, & Chase (2001).

149 The third phylogeny was derived from the Open Tree of Life (Hinchliff et al., 2015), a recent  
150 comprehensive phylogeny for all of the ~ 2.3 million named species of life, including all eukaryotes,  
151 Archaea, and Bacteria. This phylogeny, which we call tree\_otl, also did not include branch  
152 lengths. To calculate branch lengths, we first identified descendants for each of the internal nodes  
153 in tree\_otl and then searched for their divergence time in the TimeTree of Life database (Kumar,  
154 Stecher, Suleski, & Hedges, 2017). The TimeTree database was compiled based on 3,163 studies and  
155 97,085 species (as of October 10, 2017). For a pair of species included in this database, we extracted  
156 their average divergence time from all previous studies. Using the divergence date of internal  
157 nodes from the TimeTree database, we then determined the branch length of tree\_otl using  
158 Phylocom (Webb et al., 2008) and its bladj function. Recently, an updated phylogeny with branch  
159 lengths for seed plants based on the Open Tree of Life was published (Smith & Brown, 2018). We  
160 did not use this because it only has branch lengths for seed plants; other clades lack branch lengths.

161 The fourth phylogeny was a random coalescent phylogeny generated using the rcoal function  
162 from the ape R package (Paradis, Claude, & Strimmer, 2004). The random tree was then scaled to  
163 have root age of the average root age of tree\_apg, tree\_zanne, and tree\_otl. Results based on  
164 the random phylogeny should not correlate with those based on other phylogenies.

165 Not every species from the purpose-built phylogenies was found in all of the synthesis phylogenies.  
166 For the pine rockland phylogeny, 514 out of 540 species (95.2%) were found in all phylogenies. For  
167 the alpine plant phylogeny, 994 out of 1064 species (93.4%) were found in all phylogenies. For the

168 Florida flora phylogeny, 1472 out of 1548 species (95.1%) were found in all phylogenies. Therefore,  
169 we pruned the purpose-built phylogenies to have the same species as their corresponding  
170 synthesis tree. In practice, one could insert species that were missing from the derived phylogeny  
171 as polytomies in the same genus, so that all species could be included in the analysis.

## 172 **Generation of community assemblages**

173 For each purpose-built phylogeny, we simulated 1000 presence/absence site-by-species matrices.  
174 Each matrix has 30 sites, with species within each site randomly selected from the phylogeny tips  
175 representing the species pool. We fixed species richness of each site to be 50 to remove any effects  
176 of species richness on the phylogenetic diversity measures. Without setting all sites to have the  
177 same number of species, results based on different phylogenies will correlate with each other. For  
178 example, it is likely that results from `tree_random` will be highly correlated with results from  
179 other phylogenies (Appendix Fig. A1). This is because most phylogenetic diversity metrics  
180 correlate with species richness, which, in turn, will lead to correlations among them and confound  
181 the comparisons of effects of phylogeny *per se* on the measurement of phylogenetic diversity.  
182 Removing the constraint of using the same species richness does not affect our results and  
183 conclusions (Appendix Fig. A1, A2). In our current setting, the maximum total number of species  
184 across 30 sites is  $30 \times 50 = 1500$ , which is similar to the number of tips in the largest purpose-built  
185 phylogeny in our study. We selected species from the species pool randomly because previous  
186 studies demonstrated that different approaches to species selection give similar results (Swenson,  
187 [2009](#)).

## 188 **Phylogenetic diversity measurements**

189 For each site-by-species matrix, we calculated  $\alpha$  and  $\beta$  phylogenetic diversity for each of the  
190 phylogenies using indices that are commonly used in community phylogenetic studies. For



191 phylogenetic  $\alpha$  diversity, we used Faith's PD (PD), mean pairwise distance (MPD), and mean  
192 pairwise distance between the closest relatives (MNTD). PD calculates the sum of the branch  
193 lengths of all species present in an assemblage (Faith, 1992). We did *not* include the root of the  
194 phylogeny when calculating PD. MPD calculates the average pairwise distance between all species,  
195 and MNTD calculates the average pairwise distance between the closest relatives in an assemblage  
196 (Webb et al., 2002). We selected these three metrics for phylogenetic  $\alpha$  diversity among the myriad  
197 of metrics available because they are most commonly used and represent different but  
198 complementary information about phylogenetic structure of communities (Miller, Farine, & Trisos,  
199 2017; Tucker et al., 2017).

200 For phylogenetic  $\beta$  diversity, we applied UniFrac (Unif), inter-assemblage MPD (MPD\_beta),  
201 inter-assemblage MNTD (MNTD\_beta), and phylogenetic community dissimilarity (PCD) to all  
202 possible unique combinations of assemblage pairs. Unif is derived from the Jaccard dissimilarity  
203 index and calculates the total branch length unique to each assemblage relative to the total branch  
204 length of all species in a pair of assemblages (Lozupone & Knight, 2005). Therefore, it measures the  
205 fraction of evolutionary history unique to each assemblage. MPD\_beta and MNTD\_beta were  
206 derived from MPD and MNTD, respectively, but instead of comparing species within the same  
207 assemblage, they compare species from two different assemblages (Webb et al., 2008). PCD  
208 measures pairwise phylogenetic dissimilarity between assemblages by asking how much of the  
209 variance of values of a hypothetical trait among species in one assemblage can be predicted by the  
210 values of species from another. PCD is independent of species richness of the pair of assemblages  
211 and has relatively higher statistical power than other common metrics (Ives & Helmus, 2010).

212 As PD and MNTD are both correlated with species richness (Miller et al., 2017), null models that  
213 retain species composition while randomly shuffling tips of the phylogeny are commonly used to  
214 standardize phylogenetic diversity results. Despite the fact that MPD is independent of species  
215 richness, its variance changes relative to species richness (Miller et al., 2017). Therefore, null  
216 models are also frequently applied to MPD. Using the null model, standardized effect size (SES) for

217 each metric can be calculated as  $SES = \frac{X_{obs} - \text{mean}(X_{null})}{sd(X_{null})}$ , where  $X_{obs}$  is the observed value, and  $X_{null}$   
218 are the  $n$  values calculated based on null models. Recently, analytic solutions for the SES of  
219 phylogenetic alpha diversity metrics were developed (Tsirogiannis & Sandel, 2016). The analytic  
220 solutions eliminate the need for computationally expensive simulations used to calculate SES  
221 values, especially for studies in high-diversity systems. In our simulations, because all sites have  
222 the same species richness, we expected that the SES values based on the analytic solutions would  
223 have the identical results as the observed phylogenetic diversity values for the statistical analyses  
224 we conducted (correlation and linear mixed models, see the Statistical analyses section below). Our  
225 simulations confirmed this expectation (Appendix Fig. A3-A6). No analytic solutions for the SES of  
226 Unif, MNTD\_beta, and PCD are available. However, the pairwise beta diversity metrics share the  
227 same core formula with their corresponding alpha diversity metrics. We thus expect that the  
228 results based on SES of these beta diversity metrics will be the same as those based on the  
229 observed diversity values in our simulations. Given this reason and the large computational  
230 burden, we did not include the results for SES in this study.

## 231 **Statistical analyses**

232 We have two primary goals in this study. First, we want to test the correlation between  
233 phylogenetic diversity values calculated from purpose-built phylogenies and those calculated from  
234 synthesis phylogenies. Second, we want to investigate whether phylogenetic diversity calculated  
235 from synthesis phylogenies over- or under-estimates phylogenetic diversity when compared to  
236 purpose-built phylogenies. For the first goal, we calculated the average Spearman's rank-based  
237 measure of the correlation between phylogenetic diversity values from all phylogenies across the  
238 1000 simulations. We used rank-based correlation because it is the relative phylogenetic diversity,  
239 not the absolute one, that we are interested in. For the second goal, we used Linear Mixed Models  
240 (LMMs) with phylogenetic diversity values from the purpose-built phylogeny as the response  
241 variable, the phylogenetic diversity values from one of the synthesis phylogenies as the predictor,

242 and the simulation dataset as the random term. We scaled the diversity values to have mean zero  
243 and standard deviation one before fitting the models. We also forced the regression line through  
244 the origin. If the slope of the regression line is significantly different from zero, then phylogenetic  
245 diversity based on purpose-built phylogenies and synthesis phylogenies is highly correlated.  
246 Furthermore, if the slope is higher/lower than one, then the phylogenetic diversity based on the  
247 synthesis phylogenies under-/over-estimates phylogenetic diversity. For pairwise beta diversity,  
248 because of the large number of samples across all 1000 simulations ( $\binom{30}{2} \times 1000 = 435,000$ ), we  
249 randomly selected 100 simulations on which to conduct LMMs. In addition, for pairwise beta  
250 diversity, because one site can be compared with all other sites, the beta diversity values are not  
251 independent. To account for this, we included datasets, `site1` within each dataset (the first site in  
252 the site pair), and `site2` within each site (the other site in the site pair) as random terms in the  
253 LMMs. The workflow of this study is outlined in Fig. 1. All analyses were conducted with R v3.4.3  
254 (R Core Team, 2017).

## 255 Results

### 256 Alpha diversity

257 Phylogenetic alpha diversity (PD, MPD, and MNTD) values calculated with different phylogenies  
258 (`tree_purpose`, `tree_apg`, `tree_zanne`, and `tree_otl`) were highly correlated. The median  
259 Spearman's correlation of the 1000 simulations was larger than 0.63 across all comparisons ( $p <$   
260  $0.05$  for all simulations and comparisons; Fig. 2). In most cases, the median Spearman's correlation  
261 was larger than 0.85, especially for PD and MPD. Therefore, PD and MPD were more robust to  
262 varying the source of the phylogeny than MNTD. Across all comparisons, diversity values based  
263 on `tree_otl` showed the highest correlations with those based on `tree_purpose`, with an average  
264 correlation across all comparisons of 0.902. As expected, diversity values based on the random  
265 phylogeny `tree_random` were not correlated with diversity values based on other phylogenies,

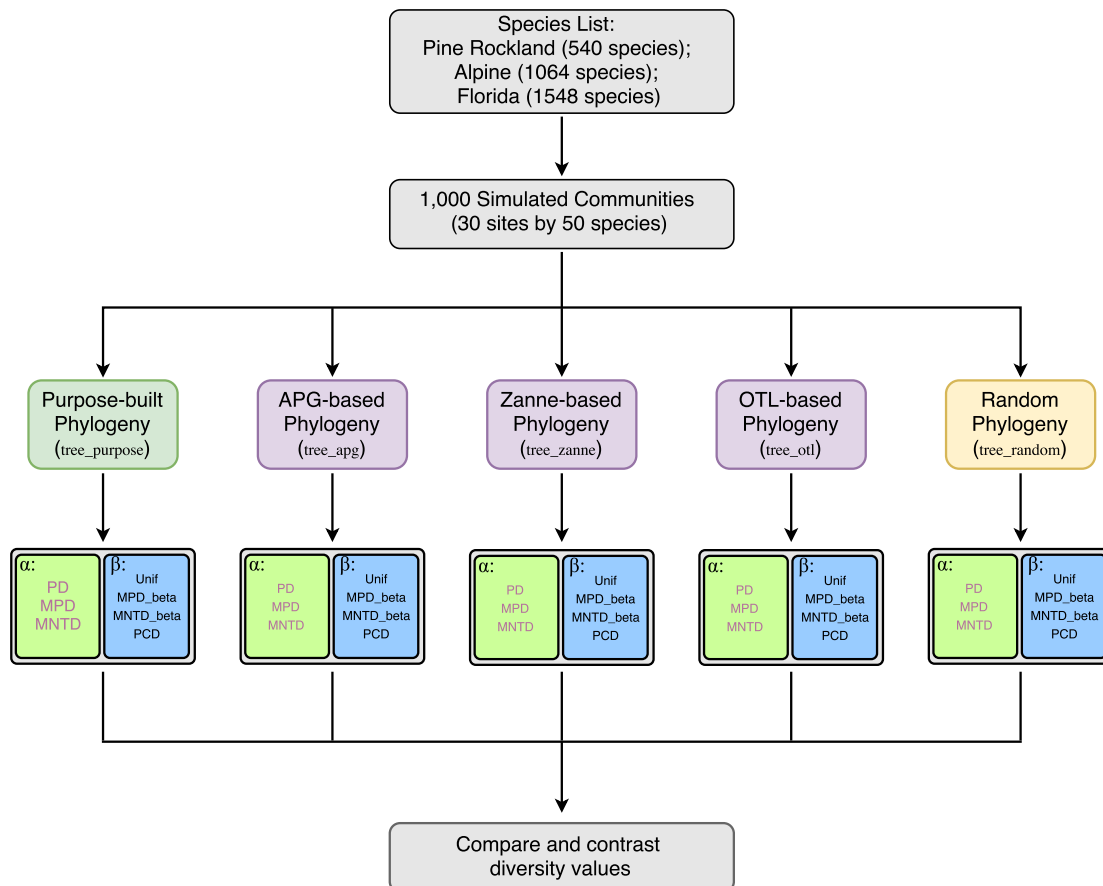

Figure 1: Workflow to assess effects of commonly used synthesis phylogenies on phylogenetic diversity estimations. Abbreviations: APG, Angiosperm Phylogeny Group; OTL, Open Tree of Life; PD, Faith's Phylogenetic diversity; MPD, Mean pairwise distance; MNTD, Mean nearest taxon distance; Unif, Unifraction; PCD, Phylogenetic community dissimilarity.

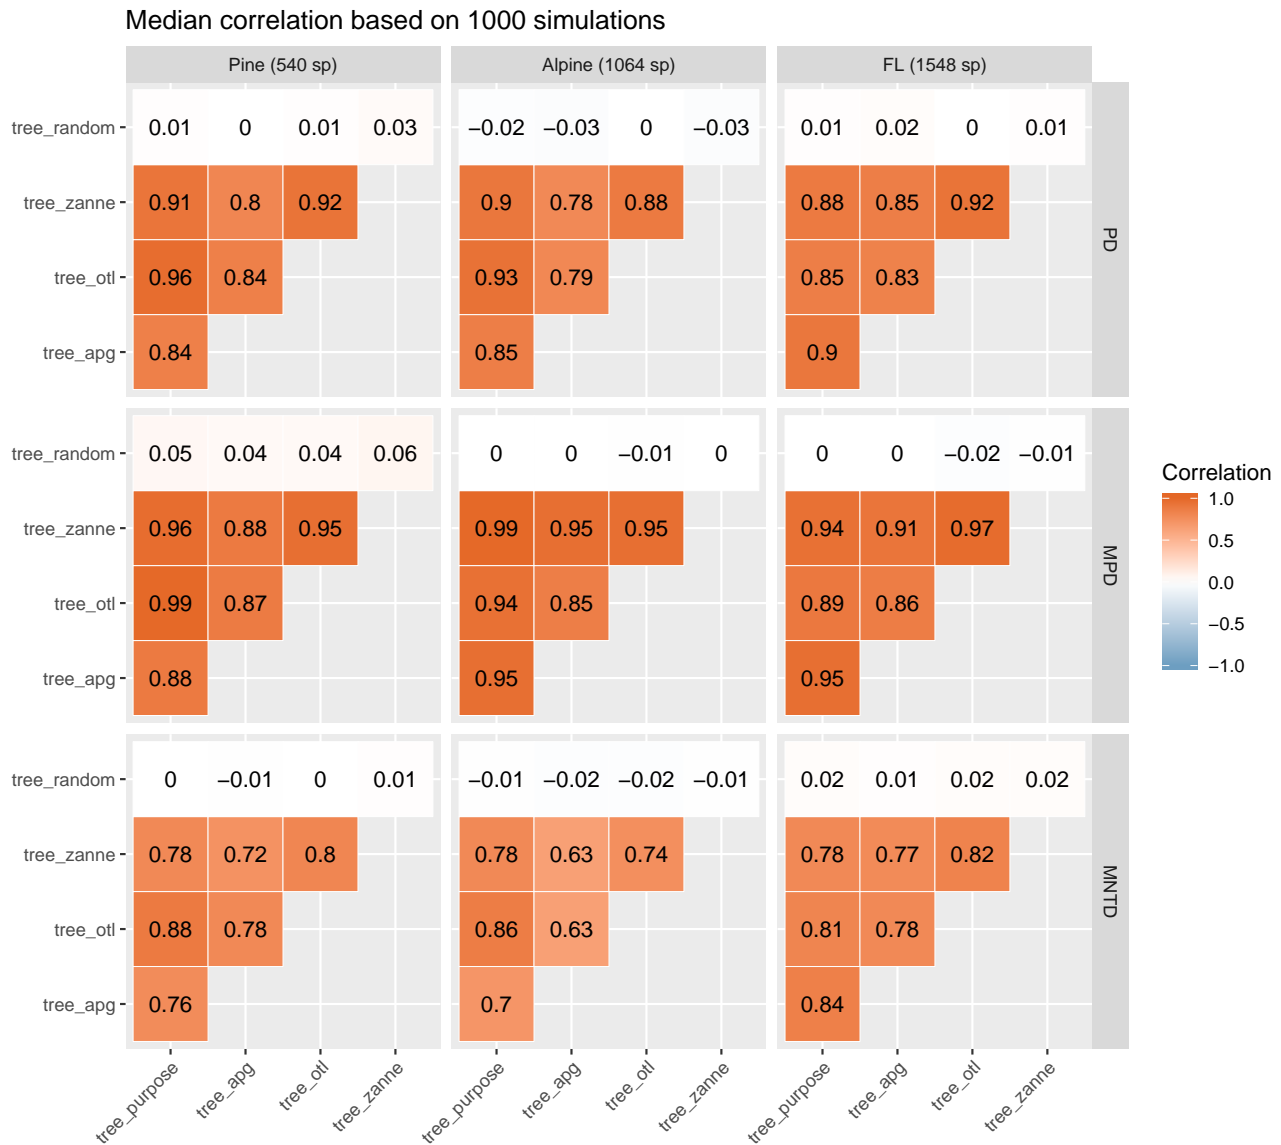

Figure 2: Median correlations of phylogenetic alpha diversity values based on different phylogenies.

266 with median Spearman's correlations close to zero (Fig. 2).

267 The slopes of linear mixed models (LMM) were all less than one (Table 1), suggesting that diversity  
 268 values based on synthesis phylogenies generally over-estimated the diversity values based on the  
 269 purpose-built phylogenies. The PD metrics based on the Open Tree of Life phylogeny (tree\_otl)  
 270 had estimates closest to those calculated from the purpose-built phylogenies (Table 1).

Table 1: Slopes based on linear mixed models (LMMs). Within the model, the response variable is the phylogenetic alpha diversity values based on the purpose-built phylogeny; the predictor is the phylogenetic alpha diversity values based on one of the synthesis phylogenies (tree\_apg, tree\_zanne, tree\_otl, and tree\_random). Therefore, slopes less than one indicate overestimations. Numbers within parentheses are the 95% confidence intervals for the slopes.

| index | dataset          | tree_apg             | tree_zanne           | tree_otl             | tree_random             |
|-------|------------------|----------------------|----------------------|----------------------|-------------------------|
| PD    | Pine (540 sp)    | 0.843 (0.837, 0.849) | 0.917 (0.913, 0.922) | 0.971 (0.969, 0.974) | -0.001 (-0.013, 0.01)   |
| PD    | Alpine (1064 sp) | 0.854 (0.848, 0.86)  | 0.915 (0.91, 0.919)  | 0.937 (0.933, 0.941) | -0.022 (-0.034, -0.01)  |
| PD    | FL (1548 sp)     | 0.92 (0.916, 0.924)  | 0.891 (0.886, 0.896) | 0.871 (0.865, 0.876) | 0.006 (-0.005, 0.018)   |
| MPD   | Pine (540 sp)    | 0.891 (0.885, 0.896) | 0.972 (0.969, 0.974) | 0.996 (0.995, 0.997) | 0.047 (0.036, 0.059)    |
| MPD   | Alpine (1064 sp) | 0.957 (0.954, 0.96)  | 0.997 (0.997, 0.998) | 0.941 (0.937, 0.945) | 0.004 (-0.008, 0.015)   |
| MPD   | FL (1548 sp)     | 0.962 (0.958, 0.965) | 0.95 (0.946, 0.953)  | 0.895 (0.889, 0.9)   | -0.002 (-0.014, 0.009)  |
| MNTD  | Pine (540 sp)    | 0.78 (0.773, 0.788)  | 0.787 (0.78, 0.794)  | 0.897 (0.892, 0.902) | 0.006 (-0.006, 0.017)   |
| MNTD  | Alpine (1064 sp) | 0.713 (0.705, 0.721) | 0.794 (0.787, 0.801) | 0.874 (0.869, 0.88)  | -0.016 (-0.028, -0.004) |
| MNTD  | FL (1548 sp)     | 0.856 (0.85, 0.862)  | 0.797 (0.79, 0.804)  | 0.831 (0.824, 0.837) | 0.03 (0.018, 0.041)     |

## Beta diversity

The phylogenetic beta diversity results (Unif, MPD\_beta, MNTD\_beta, and PCD) show a similar pattern to the alpha diversity results. Beta diversity of community pairs based on different phylogenies was also highly correlated, with the median Spearman's correlation from the 1000 simulations greater than 0.69 across all comparisons (Fig. 3). Overall, phylogenetic beta diversity is more sensitive to the source of the phylogeny than alpha diversity. MPD\_beta is the most robust beta diversity metric to the source of the phylogeny, followed by MNTD\_beta, Unif, and PCD. Again, PD metrics based on tree\_otl showed the highest correlation metrics derived from the purpose-built tree, followed by tree\_zanne and tree\_apg. Beta diversity values based on tree\_random did not correlate with values based on any other phylogeny.

The slopes of LMMs were generally less than one (Table 2), suggesting over-estimates of beta diversity when the synthesis phylogenies were used. However, slopes for MPD\_beta values based on tree\_otl were all greater than one, suggesting that beta PD metrics were under-estimated when compared to those calculated from the purpose-built trees. Metrics based on tree\_zanne for the flora of Florida dataset were also under-estimated (Table 2). For the other beta diversity metrics (i.e. Unif, MNTD\_beta, and PCD), tree\_otl generally gave results closer to those based on the

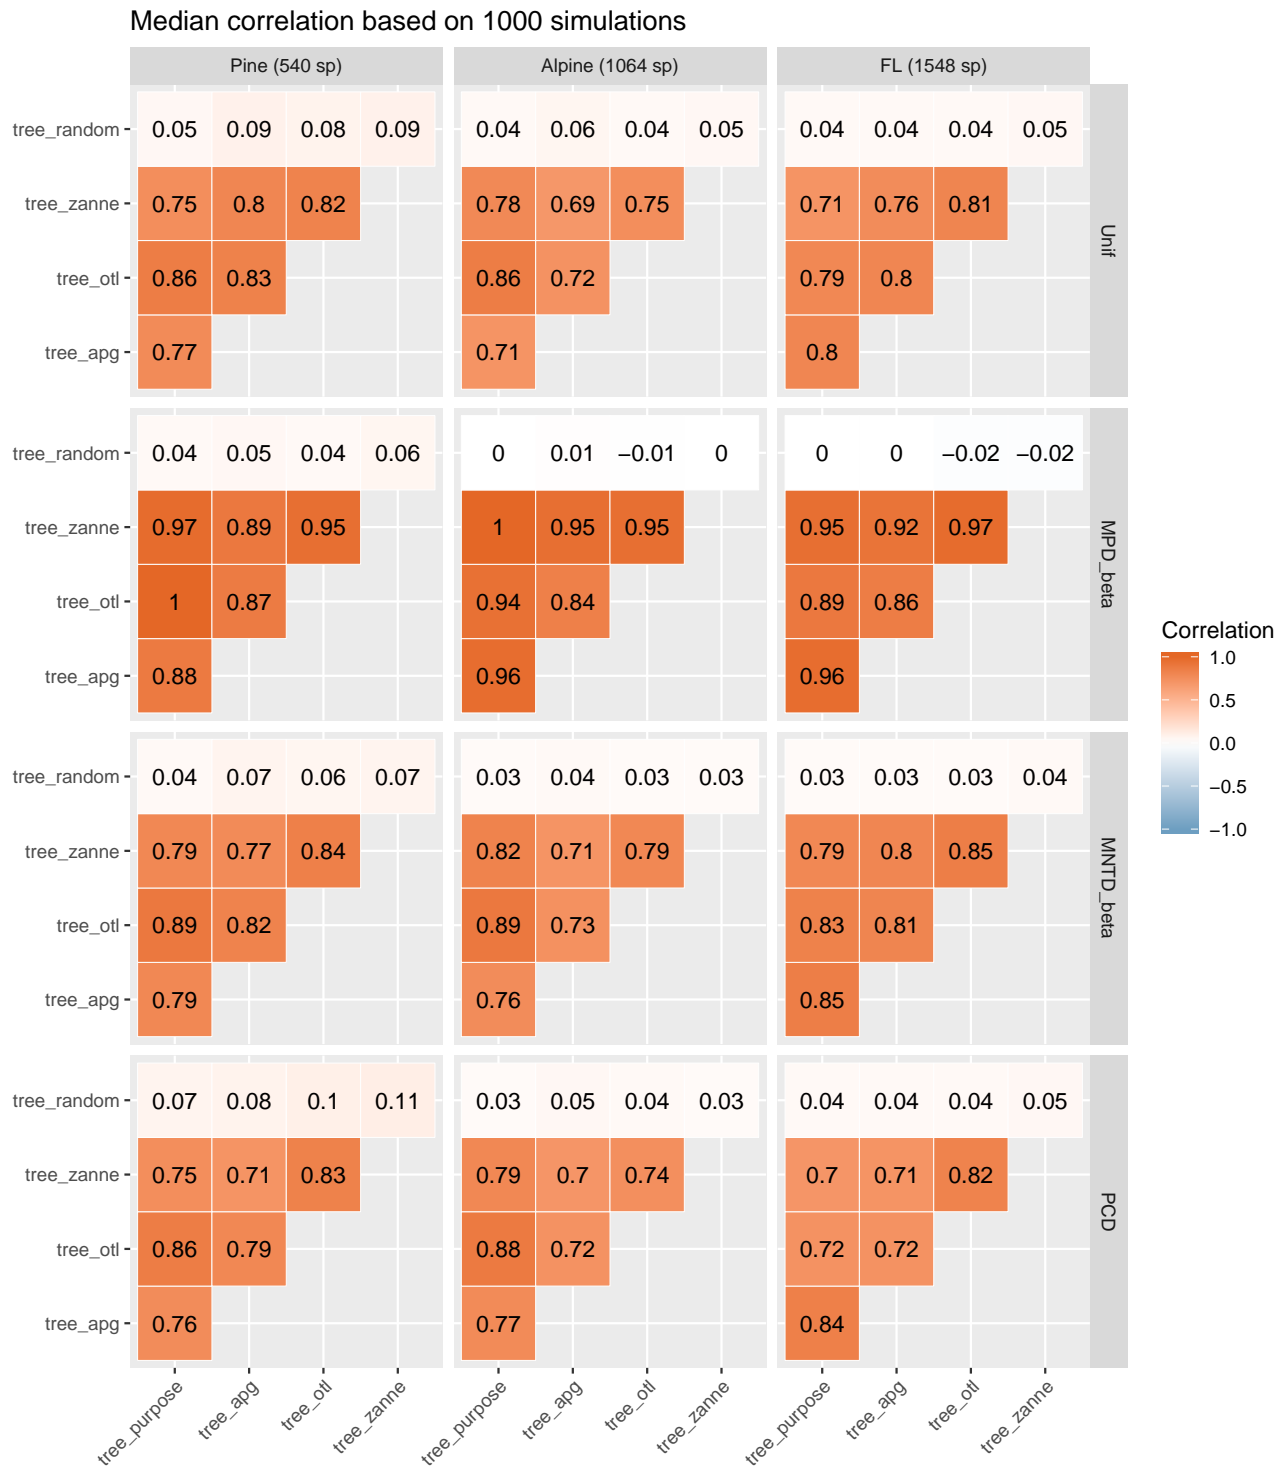

Figure 3: Median correlations of phylogenetic beta diversity values based on different phylogenies.

Table 2: Slopes based on linear mixed models (LMMs). Within the model, the response variable is the phylogenetic beta diversity values based on the purpose-built phylogeny; the predictor is the phylogenetic beta diversity values based on one of the synthesis phylogenies (tree\_apg, tree\_zanne, tree\_otl, and tree\_random). Therefore, slopes less than one indicate overestimations, and slopes greater than one are underestimates. Numbers within parentheses are the 95% confidence intervals for the slopes.

| index     | dataset          | tree_apg             | tree_zanne           | tree_otl             | tree_random            |
|-----------|------------------|----------------------|----------------------|----------------------|------------------------|
| Unif      | Pine (540 sp)    | 0.823 (0.816, 0.83)  | 0.791 (0.785, 0.797) | 0.87 (0.866, 0.875)  | 0.054 (0.04, 0.067)    |
| Unif      | Alpine (1064 sp) | 0.806 (0.798, 0.815) | 0.87 (0.863, 0.876)  | 0.895 (0.89, 0.9)    | 0.063 (0.052, 0.074)   |
| Unif      | FL (1548 sp)     | 0.871 (0.865, 0.877) | 0.792 (0.785, 0.8)   | 0.815 (0.809, 0.822) | 0.065 (0.052, 0.078)   |
| MPD_beta  | Pine (540 sp)    | 0.343 (0.336, 0.35)  | 0.967 (0.959, 0.975) | 1.249 (1.234, 1.263) | 0.011 (0.004, 0.017)   |
| MPD_beta  | Alpine (1064 sp) | 0.801 (0.794, 0.807) | 0.977 (0.975, 0.98)  | 1.12 (1.104, 1.137)  | 0.002 (-0.002, 0.006)  |
| MPD_beta  | FL (1548 sp)     | 0.788 (0.78, 0.797)  | 1.347 (1.331, 1.363) | 1.815 (1.787, 1.842) | -0.003 (-0.007, 0.001) |
| MNTD_beta | Pine (540 sp)    | 0.855 (0.846, 0.864) | 0.854 (0.846, 0.862) | 0.931 (0.926, 0.937) | 0.049 (0.038, 0.061)   |
| MNTD_beta | Alpine (1064 sp) | 0.891 (0.883, 0.9)   | 0.948 (0.941, 0.955) | 0.94 (0.935, 0.945)  | 0.062 (0.051, 0.073)   |
| MNTD_beta | FL (1548 sp)     | 0.788 (0.782, 0.793) | 0.759 (0.752, 0.765) | 0.752 (0.746, 0.758) | 0.035 (0.024, 0.045)   |
| PCD       | Pine (540 sp)    | 0.855 (0.847, 0.864) | 0.836 (0.827, 0.846) | 0.876 (0.869, 0.884) | 0.083 (0.07, 0.095)    |
| PCD       | Alpine (1064 sp) | 0.824 (0.816, 0.832) | 0.909 (0.9, 0.918)   | 0.905 (0.898, 0.911) | 0.076 (0.065, 0.088)   |
| PCD       | FL (1548 sp)     | 0.805 (0.798, 0.812) | 0.755 (0.747, 0.763) | 0.727 (0.718, 0.735) | 0.052 (0.039, 0.066)   |

287 purpose-built trees than did the other synthesis phylogenies.

## 288 Discussion

289 We examined how different phylogenies, purpose-built and synthesis tree subsets, influenced  
 290 phylogenetic alpha and beta diversity measures commonly used in community phylogenetic  
 291 analyses. We found two main results. First, the synthesis phylogenies generally over-estimated  
 292 phylogenetic diversity compared with purpose-built phylogenies. This is not surprising because  
 293 synthesis phylogenies generally have higher proportions of polytomies than purpose-built ones,  
 294 which, in turn, leads to larger distances between species within these polytomies. This result  
 295 agrees with Boyle & Adamowicz (2015) but contradicts Swenson (2009), who found that  
 296 phylogenies with more polytomies underestimated phylogenetic diversity. Second, these  
 297 over-estimated phylogenetic diversity values, however, were highly correlated with those based on  
 298 purpose-built phylogenies. These results hold for both alpha and beta diversity and for  
 299 phylogenies with different numbers of tips. While our study focuses on plants, we expect that our



300 results will generalize to any taxonomic group. Therefore, phylogenies derived from synthesis  
301 trees can provide similar results to purpose-built phylogenies while saving effort and time when  
302 quantifying and comparing phylogenetic diversity of communities.

303 One main reason for this conclusion is that, as ecologists and conservation biologists, we mostly  
304 care about the relative diversity among communities instead of their absolute diversity. For  
305 example, for a set of communities within one region, we may be interested in which communities  
306 have the highest/lowest phylogenetic diversity. The absolute phylogenetic diversity of each  
307 community does not mean much without comparing it to other communities. Because  
308 phylogenetic values based on different phylogenies are highly correlated with each other, the  
309 information available for community phylogenetic questions does not differ much between  
310 approaches. Even though such synthesis phylogenies may overestimate absolute phylogenetic  
311 diversity for communities, the relative phylogenetic diversity among communities will be similar  
312 to those calculated from better resolved but less accessible phylogenies. Based on the information  
313 provided by relative values of phylogenetic diversity, the improved resolution of purpose-built  
314 trees for calculating the absolute PD is likely not worth the effort for community phylogenetic  
315 questions. Of course, it will not hurt to use a purpose-built tree if one is available.

316 Our finding that phylogenetic diversity metrics are relatively insensitive to the phylogenies from  
317 which they are derived has been supported by other recent studies. For example, using simulated  
318 fully bifurcating and gradually unresolved phylogenies, Swenson (2009) found that phylogenetic  
319 diversity measures are generally robust to the uncertainty of the phylogenies, especially if the  
320 uncertainty is concentrated in recent nodes of the phylogeny. Using multiple posterior  
321 phylogenies of bats, Patrick & Stevens (2014) rearranged branches across these phylogenies and  
322 also found that phylogenetic diversity measures are robust to the phylogenies from which they are  
323 calculated. More recently, Cadotte (2015) transformed a phylogeny with different evolution models  
324 and found that phylogenetic diversity measures are insensitive to the branch lengths of the  
325 phylogeny; getting the topology right is more important when calculating phylogenetic diversity.

326 These studies, however, only focused on alpha diversity. Our study extends the literature by also  
327 examining the effects of phylogenies on beta diversity. We found the same pattern for beta  
328 diversity and alpha diversity. Taken together, a general pattern emerges: community phylogenetic  
329 alpha and beta diversity metrics are robust to reasonably good modern phylogenies.

330 Why are phylogenetic diversity values from purpose-built and synthesis phylogenies highly  
331 correlated? There are two possible reasons. First, both purpose-built and synthesis phylogenies  
332 likely share a similar systematic backbone and empirical resources such as genes, taxonomies, and  
333 expert knowledge. This guarantees that phylogenetic diversity based on these phylogenies will not  
334 be dramatically different. Second, phylogenetic diversity metrics aggregate (by summing or  
335 averaging) all information into one value for each site, which could help buffer most uncertainty  
336 and further mask most of the differences between different phylogenies.

337 Our results should encourage ecologists to increasingly include phylogenetic analyses in  
338 community ecology studies given the growing accessibility of synthesis phylogenies and the  
339 robustness of phylogenetic diversity measures based on them. However, our results should not  
340 discourage the construction of purpose-built phylogenies, which are clearly valuable for many  
341 ecological and evolutionary questions. This is especially the case for purpose-built trees  
342 constructed from local DNA samples. First, the sequencing of species in a given community can  
343 yield data for species that have never been sequenced before. These new sequences can then be  
344 incorporated into synthesis trees, improving their resolution for future research. Direct  
345 sequencing of samples collected for a community is also important when the community contains  
346 un-described (Pons et al., 2006) or cryptic species (Hebert, Penton, Burns, Janzen, & Hallwachs,  
347 2004). In addition, the rapidly increasing use of DNA barcoding to detail feeding interactions  
348 (Kaartinen, Stone, Hearn, Lohse, & Roslin, 2010) requires high-quality local DNA barcode libraries  
349 to most accurately identify those interactions (García-Robledo, Erickson, Staines, Erwin, & Kress,  
350 2013). Finally, for many taxonomic groups, synthesis trees are not available or are far too poorly  
351 sampled, and constructing purpose-built trees is the only approach possible for community

352 phylogenetic analyses.

## 353 **Conclusion**

354 Community phylogenetics is rapidly becoming an important component of community ecology,  
355 macroecology, and biodiversity conservation (Webb et al., 2002; Vamosi et al., 2009). When  
356 calculating and comparing phylogenetic diversity of communities, an important question arises:  
357 can we derive phylogenies from synthesis trees or should we generate our own purpose-built  
358 phylogenies? Our results suggest that phylogenies derived from common synthesis trees  
359 overestimate phylogenetic diversity metrics when compared to purpose-built trees, but values of  
360 phylogenetic diversity are highly correlated with purpose-built metrics. Particularly, the Open  
361 Tree of Life, which includes all major phylogenetic groups (e.g. plants, birds, fishes, mammals,  
362 fungi, Archaea, Bacteria, etc.), produced the most similar values of phylogenetic diversity when  
363 compared to metrics derived from purpose-built trees. Furthermore, a recently updated Open Tree  
364 of Life phylogeny for seed plants has branch lengths calculated based on molecular data (Smith &  
365 Brown, 2018). With new data and studies continuously being integrated into synthesis trees such  
366 as the Open Tree of Life, these resources are poised to improve rapidly. As a result, for comparing  
367 phylogenetic diversity among communities, we recommend taking advantage of recent  
368 well-developed products such as the Open Tree of Life.

## 369 **Acknowledgments**

370 This study was supported by NSF grants ABI-458034 to BB, DEB-1442280 and DBI-1458640 to PSS  
371 and DES, EF-1115210 and DBI-1547229 to PSS, and EF-1550838 (supported HEM).

## 372 **Authors' contributions**

373 DL conceived the idea with help from BB, subsetted synthesis phylogenies, conducted all  
374 simulations and analyses, and wrote the first draft of the manuscript. LT, BB, HM, JA, DS, PS, and  
375 RG contributed purpose-built phylogenies. All authors helped with results interpretation, revised  
376 the manuscript, and gave final approval for publication.

## 377 **References**

378 Antonelli, A., Hettling, H., Condamine, F. L., Vos, K., Nilsson, R. H., Sanderson, M. J., ... others.  
379 (2017). Toward a self-updating platform for estimating rates of speciation and migration, ages, and  
380 relationships of taxa. *Systematic Biology*, 66(2), 152–166.

381 Baum, D. A., & Smith, S. D. (2012). *Tree thinking: An introduction to phylogenetic biology*. Roberts;  
382 Co., Greenwood Village, CO.

383 Bininda-Emonds, O. R., Cardillo, M., Jones, K. E., MacPhee, R. D., Beck, R. M., Grenyer, R., ...

384 Purvis, A. (2007). The delayed rise of present-day mammals. *Nature*, 446(7135), 507.

385 Boyle, E. E., & Adamowicz, S. J. (2015). Community phylogenetics: Assessing tree reconstruction  
386 methods and the utility of dna barcodes. *PloS One*, 10(6), e0126662.

387 Cadotte, M. W. (2015). Phylogenetic diversity–ecosystem function relationships are insensitive to  
388 phylogenetic edge lengths. *Functional Ecology*, 29(5), 718–723.

389 Cardillo, M. (2011). Phylogenetic structure of mammal assemblages at large geographical scales:  
390 Linking phylogenetic community ecology with macroecology. *Philosophical Transactions of the*  
391 *Royal Society B: Biological Sciences*, 366(1577), 2545–2553.

392 Cavender-Bares, J., Keen, A., & Miles, B. (2006). Phylogenetic structure of floridian plant

- 393 communities depends on taxonomic and spatial scale. *Ecology*, 87(sp7), S109–S122.
- 394 Drummond, A. J., & Rambaut, A. (2007). BEAST: Bayesian evolutionary analysis by sampling trees.  
395 *BMC Evolutionary Biology*, 7(1), 214.
- 396 Eastman, J. M., Harmon, L. J., & Tank, D. C. (2013). Congruification: Support for time scaling large  
397 phylogenetic trees. *Methods in Ecology and Evolution*, 4(7), 688–691.
- 398 Edgar, R. C. (2004). MUSCLE: Multiple sequence alignment with high accuracy and high  
399 throughput. *Nucleic Acids Research*, 32(5), 1792–1797.
- 400 Faith, D. P. (1992). Conservation evaluation and phylogenetic diversity. *Biological Conservation*,  
401 61(1), 1–10.
- 402 Forest, F., Grenyer, R., Rouget, M., Davies, T. J., Cowling, R. M., Faith, D. P., ... others. (2007).  
403 Preserving the evolutionary potential of floras in biodiversity hotspots. *Nature*, 445(7129), 757–760.
- 404 Fritz, S. A., Bininda-Emonds, O. R., & Purvis, A. (2009). Geographical variation in predictors of  
405 mammalian extinction risk: Big is bad, but only in the tropics. *Ecology Letters*, 12(6), 538–549.
- 406 García-Robledo, C., Erickson, D. L., Staines, C. L., Erwin, T. L., & Kress, W. J. (2013). Tropical  
407 plant–herbivore networks: Reconstructing species interactions using dna barcodes. *PLoS One*, 8(1),  
408 e52967.
- 409 Hebert, P. D., Penton, E. H., Burns, J. M., Janzen, D. H., & Hallwachs, W. (2004). Ten species in one:  
410 DNA barcoding reveals cryptic species in the neotropical skipper butterfly *astrapttes fulgurator*.  
411 *Proceedings of the National Academy of Sciences of the United States of America*, 101(41),  
412 14812–14817.
- 413 Helmus, M. R., Savage, K., Diebel, M. W., Maxted, J. T., & Ives, A. R. (2007). Separating the  
414 determinants of phylogenetic community structure. *Ecology Letters*, 10(10), 917–925.
- 415 Hinchliff, C. E., Smith, S. A., Allman, J. F., Burleigh, J. G., Chaudhary, R., Coghill, L. M., ... others.

- 416 (2015). Synthesis of phylogeny and taxonomy into a comprehensive tree of life. *Proceedings of the*  
417 *National Academy of Sciences*, 112(41), 12764–12769.
- 418 Ives, A. R., & Helmus, M. R. (2010). Phylogenetic metrics of community similarity. *The American*  
419 *Naturalist*, 176(5), E128–E142.
- 420 Jetz, W., Thomas, G., Joy, J., Hartmann, K., & Mooers, A. (2012). The global diversity of birds in  
421 space and time. *Nature*, 491(7424), 444–448.
- 422 Kaartinen, R., Stone, G. N., Hearn, J., Lohse, K., & Roslin, T. (2010). Revealing secret liaisons: DNA  
423 barcoding changes our understanding of food webs. *Ecological Entomology*, 35(5), 623–638.
- 424 Kumar, S., Stecher, G., Suleski, M., & Hedges, S. B. (2017). TimeTree: A resource for timelines,  
425 timetrees, and divergence times. *Molecular Biology and Evolution*, 34(7), 1812–1819.
- 426 Lanfear, R., Calcott, B., Ho, S. Y., & Guindon, S. (2012). PartitionFinder: Combined selection of  
427 partitioning schemes and substitution models for phylogenetic analyses. *Molecular Biology and*  
428 *Evolution*, 29(6), 1695–1701.
- 429 Lavergne, S., Mouquet, N., Thuiller, W., & Ronce, O. (2010). Biodiversity and climate change:  
430 Integrating evolutionary and ecological responses of species and communities. *Annual Review of*  
431 *Ecology, Evolution, and Systematics*, 41, 321–350.
- 432 Li, D., Ives, A. R., & Waller, D. M. (2017). Can functional traits account for phylogenetic signal in  
433 community composition? *New Phytologist*, 214(2), 607–618.
- 434 Lozupone, C., & Knight, R. (2005). UniFrac: A new phylogenetic method for comparing microbial  
435 communities. *Applied and Environmental Microbiology*, 71(12), 8228–8235.
- 436 Maherali, H., & Klironomos, J. N. (2007). Influence of phylogeny on fungal community assembly  
437 and ecosystem functioning. *Science*, 316(5832), 1746–1748.
- 438 Marx, H. E., Dentant, C., Renaud, J., Delunel, R., Tank, D. C., & Lavergne, S. (2017). Riders in the

- 439 sky (islands): Using a mega-phylogenetic approach to understand plant species distribution and  
440 coexistence at the altitudinal limits of angiosperm plant life. *Journal of Biogeography*, 44(11),  
441 2618–2630.
- 442 Miller, E. T., Farine, D. R., & Trisos, C. H. (2017). Phylogenetic community structure metrics and  
443 null models: A review with new methods and software. *Ecography*, 40(4), 461–477.
- 444 Paradis, E., Claude, J., & Strimmer, K. (2004). APE: Analyses of phylogenetics and evolution in R  
445 language. *Bioinformatics*, 20, 289–290.
- 446 Park, D. S., Worthington, S., & Xi, Z. (2018). Taxon sampling effects on the quantification and  
447 comparison of community phylogenetic diversity. *Molecular Ecology*.
- 448 Patrick, L. E., & Stevens, R. D. (2014). Investigating sensitivity of phylogenetic community  
449 structure metrics using north american desert bats. *Journal of Mammalogy*, 95(6), 1240–1253.
- 450 Pearse, W. D., & Purvis, A. (2013). PhyloGenerator: An automated phylogeny generation tool for  
451 ecologists. *Methods in Ecology and Evolution*, 4(7), 692–698.
- 452 Pons, J., Barraclough, T. G., Gomez-Zurita, J., Cardoso, A., Duran, D. P., Hazell, S., ... Vogler, A. P.  
453 (2006). Sequence-based species delimitation for the dna taxonomy of undescribed insects.  
454 *Systematic Biology*, 55(4), 595–609.
- 455 Rabosky, D. L., Santini, F., Eastman, J., Smith, S. A., Sidlauskas, B., Chang, J., & Alfaro, M. E. (2013).  
456 Rates of speciation and morphological evolution are correlated across the largest vertebrate  
457 radiation. *Nature Communications*, 4.
- 458 R Core Team. (2017). *R: A language and environment for statistical computing*. Vienna, Austria: R  
459 Foundation for Statistical Computing. Retrieved from <https://www.R-project.org/>
- 460 Ronquist, F., & Huelsenbeck, J. P. (2003). MrBayes 3: Bayesian phylogenetic inference under mixed  
461 models. *Bioinformatics*, 19(12), 1572–1574.

- 462 Smith, M. A., Hallwachs, W., & Janzen, D. H. (2014). Diversity and phylogenetic community  
463 structure of ants along a costa rican elevational gradient. *Ecography*, 37(8), 720–731.
- 464 Smith, S. A., Beaulieu, J. M., & Donoghue, M. J. (2009). Mega-phylogeny approach for comparative  
465 biology: An alternative to supertree and supermatrix approaches. *BMC Evolutionary Biology*, 9(1),  
466 37.
- 467 Smith, S. A., & Brown, J. W. (2018). Constructing a broadly inclusive seed plant phylogeny.  
468 *American Journal of Botany*.
- 469 Stamatakis, A. (2014). RAxML version 8: A tool for phylogenetic analysis and post-analysis of large  
470 phylogenies. *Bioinformatics*, 30(9), 1312–1313.
- 471 Swenson, N. G. (2009). Phylogenetic resolution and quantifying the phylogenetic diversity and  
472 dispersion of communities. *PloS One*, 4(2), e4390.
- 473 Trotta, L., Baiser, B., Possley, J., Li, D., Lange, J., Martin, S., & Sessa, E. (2018). Community  
474 phylogeny of the globally critically imperiled pine rockland ecosystem. *American Journal of*  
475 *Botany*.
- 476 Tsirogiannis, C., & Sandel, B. (2016). PhyloMeasures: A package for computing phylogenetic  
477 biodiversity measures and their statistical moments. *Ecography*, 39(7), 709–714.
- 478 Tucker, C. M., Cadotte, M. W., Carvalho, S. B., Davies, T. J., Ferrier, S., Fritz, S. A., ... others. (2017).  
479 A guide to phylogenetic metrics for conservation, community ecology and macroecology.  
480 *Biological Reviews*, 92(2), 698–715.
- 481 Vamosi, S., Heard, S., Vamosi, J., & Webb, C. (2009). Emerging patterns in the comparative analysis  
482 of phylogenetic community structure. *Molecular Ecology*, 18(4), 572–592.
- 483 Webb, C. O., Ackerly, D. D., & Kembel, S. W. (2008). Phylocom: Software for the analysis of  
484 phylogenetic community structure and trait evolution. *Bioinformatics*, 24(18), 2098–2100.



485 Webb, C. O., Ackerly, D. D., McPeck, M. A., & Donoghue, M. J. (2002). Phylogenies and community  
486 ecology. *Annual Review of Ecology and Systematics*, 33(1), 475–505.

487 Webb, C. O., & Donoghue, M. J. (2005). Phylomatic: Tree assembly for applied phylogenetics.  
488 *Molecular Ecology Resources*, 5(1), 181–183.

489 Wikström, N., Savolainen, V., & Chase, M. W. (2001). Evolution of the angiosperms: Calibrating the  
490 family tree. *Proceedings of the Royal Society of London B: Biological Sciences*, 268(1482), 2211–2220.

491 Zanne, A. E., Tank, D. C., Cornwell, W. K., Eastman, J. M., Smith, S. A., FitzJohn, R. G., ... others.  
492 (2014). Three keys to the radiation of angiosperms into freezing environments. *Nature*, 506(7486),  
493 89–92.
