# For comparing phylogenetic diversity among communities, go ahead and use synthesis phylogenies

*Daijiang Li<sup>1</sup>, Lauren Trotta<sup>1</sup>, Hannah E. Marx<sup>2</sup>, Julie M. Allen<sup>3</sup>, Miao Sun<sup>3</sup>,  
Douglas E. Soltis<sup>3</sup>, Pamela S. Soltis<sup>3</sup>, Robert P. Guralnick<sup>3</sup>, and Benjamin Baiser<sup>1</sup>*

*27 September, 2018*

<sup>1</sup>Department of Wildlife Ecology and Conservation, University of Florida, Gainesville, FL 32611,  
USA

<sup>2</sup>Department of Ecology and Evolutionary Biology, University of Arizona, PO Box 210088, Tucson,  
AZ 85721, USA

<sup>3</sup>Florida Museum of Natural History, University of Florida, Gainesville, FL 32611, USA

Email: [daijianglee@gmail.com](mailto:daijianglee@gmail.com) (Corresponding author, ORCID:

<http://orcid.org/0000-0002-0925-3421>)

**Running headline:** Phylogenetic diversity based on different trees

**Abstract:**

Should we build our own phylogenetic trees based on gene sequence data, or can we simply use available synthesis phylogenies? This is a fundamental question that any study involving a phylogenetic framework must face at the beginning of the project. Building a phylogeny from gene sequence data (purpose-built phylogeny) requires more effort and expertise than subsetting

20 an already available phylogeny (synthesis-based phylogeny). If phylogenetic diversity estimates  
21 based on these two types of phylogenies are highly correlated, using readily available  
22 synthesis-based phylogenies is justified for comparing phylogenetic diversity among communities.  
23 However, a comparison of how these two approaches to building phylogenetic trees influence the  
24 calculation of phylogenetic diversity has not been explicitly tested. We generated three  
25 purpose-built phylogenies and their corresponding synthesis-based trees (two from Phylomatic  
26 and one from the Open Tree of Life). We then used a simulation approach to generate 1000  
27 communities with a fixed number of species per site and compared the effects of different trees on  
28 estimates of phylogenetic alpha and beta diversity using Spearman's rank-based correlation and  
29 linear mixed models. Synthesis-based phylogenies generally over-estimated phylogenetic diversity  
30 when compared to purpose-built ones. However, their resulting measures of phylogenetic diversity  
31 were highly correlated (Spearman's  $r > 0.8$  in most cases). Mean pairwise distance (both alpha and  
32 beta) is the index that is most robust to the differences in tree construction that we tested.  
33 Measures of phylogenetic diversity based on the Open Tree of Life showed the highest correlation  
34 with measures based on the purpose-built phylogenies. For comparing phylogenetic diversity  
35 among communities, our results justify taking advantage of recently developed and continuously  
36 improving synthesis trees such as the Open Tree of Life.

37 Key words: alpha diversity, beta diversity, community phylogenetic structure, open tree of life,  
38 phylogenetic diversity, purpose-built phylogeny, synthesis tree.

## 39 **Introduction**

40 Phylogenies describe the evolutionary history of species and provide important tools to study  
41 ecological and evolutionary questions (Baum and Smith 2012). Recently, phylogenies have been  
42 used to better understand patterns of community assembly. The phylogenetic structure of  
43 ecological communities can lend insight into the processes by which local communities assemble

44 from regional species pools (Webb et al. 2002). For example, if closely related species are more  
45 likely to co-occur in the same habitats, we might suspect that these species share traits that allow  
46 them to have a positive growth rate under the environmental conditions in these habitats. To test  
47 whether closely related species are more or less likely to co-occur, one common approach is to  
48 calculate the phylogenetic diversity of communities and then compare the observed phylogenetic  
49 diversity with those expected by chance through different null models. There is a growing body of  
50 literature using this community phylogenetic approach, documenting the phylogenetic structure  
51 of ecological communities across taxa and scales (Webb et al. 2002, Cavender-Bares et al. 2006,  
52 Helmus et al. 2007, Vamosi et al. 2009, Cardillo 2011, Smith et al. 2014, Li et al. 2017, Marx et al.  
53 2017).

54 As an important facet of biodiversity, phylogenetic diversity (Faith 1992) also plays a crucial role in  
55 conservation biology by complementing more traditional taxonomic measures of biodiversity (e.g.,  
56 species richness). For example, two communities can have the same number of species but differ  
57 drastically in their phylogenetic diversity depending on relatedness of the constituent species. The  
58 community with higher phylogenetic diversity, representing taxa more distantly related to each  
59 other, is expected to be more stable and productive given its greater evolutionary potential to  
60 adapt to changing environmental conditions (Forest et al. 2007, Maherali and Klironomos 2007,  
61 Lavergne et al. 2010). Therefore, all else being equal, a community with higher phylogenetic  
62 diversity should have higher conservation priority.

63 The information gained from phylogenetic diversity analyses are only as good as the species  
64 composition data and the phylogenies from which they are generated. In this manuscript, we  
65 explore how tree generation affects these phylogenetic diversity metrics. Generally, ecologists and  
66 evolutionary biologists use two common approaches to build phylogenies for community  
67 phylogenetic analyses. The first approach is for a researcher to generate his/her own phylogenies  
68 for a set of target species based on gene sequence data. We refer to such phylogenies as  
69 purpose-built phylogenies. The second approach is to derive phylogenies based on available

70 synthesis trees, such as the Open Tree of Life<sup>1</sup>, or classifications, such as the Angiosperm  
71 Phylogeny Group (APG IV et al. 2016), by pruning or sampling, respectively, from the resource so  
72 that the phylogeny contains only the target species. We refer to such phylogenies as  
73 synthesis-based phylogenies. To a certain extent, one can argue that a synthesis tree could be a  
74 purpose-built tree for a larger set of species, but the sources for deriving the synthesis-based trees  
75 vary in scope, methodology, assumptions, and content (see Materials and Methods for further  
76 description of source trees for synthesis-based phylogenies). From a researcher perspective, a  
77 purpose-built phylogeny is a major undertaking but offers potential to utilize taxonomic and  
78 phylogenetic expertise often needed in order to successfully construct trees. Synthesis trees, as  
79 compilations of peer-reviewed phylogenetic hypotheses, offer an immediately available, but  
80 typically less customizable output to researchers. We thus use these two terms (purpose-built and  
81 synthesis-based) to categorize the underlying methods and researcher cost-benefits to obtain  
82 phylogenies.

83 Generating a purpose-built tree requires more effort and expertise than subsetting a  
84 well-developed phylogeny or sampling from a classification. Generally, purpose-built trees are  
85 constructed by using newly generated sequence data and then combining those data with data  
86 already available on GenBank; although in many cases the researcher may simply use what is in  
87 GenBank. The first step requires gathering tissue for taxa of interest either from field or museum  
88 collections, extracting DNA from these tissue samples, and then identifying, amplifying, and  
89 sequencing appropriate loci. The gene regions selected are typically based on the taxa of interest  
90 and discipline-accepted standards. Resulting sequences are aligned in programs like MUSCLE  
91 (Edgar 2004). Sequences are also commonly sourced entirely or as an addition to sequence data  
92 already in databases like GenBank with the help of computational pipelines such as PHLAWD  
93 (Smith et al. 2009). Appropriate models of evolution for phylogenetic estimation are determined  
94 using programs like PartitionFinder (Lanfear et al. 2012) such that each gene region in a set of  
95 concatenated sequences can be treated separately. The most appropriate models of nucleotide

---

<sup>1</sup><https://tree.opentreeoflife.org/opentree>

96 evolution are used to estimate phylogenies in Maximum Likelihood (ML) and/or Bayesian  
97 Inference (BI) frameworks in programs like RAxML (Stamatakis 2014), MrBayes (Ronquist and  
98 Huelsenbeck 2003), and BEAST (Drummond and Rambaut 2007). Depending on the desired  
99 application, it may be necessary to impose topological constraints to ease phylogenetic inference  
100 or fossil constraints to scale branch lengths to time. Statistics for clade support are calculated using  
101 bootstrap or jack-knifing techniques in an ML framework, and posterior probabilities in BI.  
102 Despite the fact that multiple software programs are available to help automate these processes  
103 (e.g., phyloGenerator (Pearse and Purvis 2013), SUPERSMART (Antonelli et al. 2017)), many  
104 decisions at different steps must be made based on expert knowledge (e.g., Which genes to select?  
105 How to select models? Which software program to use? How to estimate divergence time?).  
106 Because of the effort, expertise, and cost required to generate purpose-built phylogenies, many  
107 community phylogenetic studies use a second approach: deriving phylogenies from available  
108 synthesis trees. Over the past few decades, tremendous advances in computational tools and  
109 increasingly available genetic sequence data have led to vastly improved phylogenies for plants  
110 (Zanne et al. 2014), birds (Jetz et al. 2012), fishes (Rabosky et al. 2013), and mammals  
111 (Bininda-Emonds et al. 2007, Fritz et al. 2009). Such advances in phylogenetics have facilitated the  
112 synthesis of all available information to make a comprehensive tree of life on Earth (Hinchliff et al.  
113 2015). With these available synthesis trees and software programs such as Phylomatic (Webb and  
114 Donoghue 2005), ecologists can derive phylogenies for the species or communities they are  
115 interested in with less effort and limited cost. When different studies use the same synthesis tree to  
116 derive their phylogenies, their phylogenetic diversity results are comparable. Importantly, this may  
117 not be the case if they use purpose-built phylogenies. In addition, these approaches may avoid  
118 some issues when generating phylogenies from sequence data such as taxon sampling effects (Park  
119 et al. 2018). However, the tractability of phylogenies based on synthesis trees often comes with the  
120 cost of decreased resolution (e.g., increase in polytomies) of the resulting phylogenies compared  
121 with purpose-built ones; such trees also have taxonomic gaps, which are often filled using existing  
122 classifications to become comprehensive.

123 Previous studies have demonstrated that most phylogenetic diversity metrics are robust to  
124 terminal polytomies (Swenson 2009, Patrick and Stevens 2014, Boyle and Adamowicz 2015). These  
125 studies, however, used simulated phylogenies or compared different posterior purpose-built  
126 phylogenies. Therefore, they provided little practical advice about selecting between purpose-built  
127 and synthesis-based phylogenies for ecological studies. In this study, we compared phylogenetic  
128 diversity metrics calculated from purpose-built phylogenies and corresponding phylogenies  
129 derived from three commonly used sources. It is important to note that we do not treat the  
130 purpose-built phylogenies as a gold standard and we recognize that sampling bias of both taxa and  
131 genes, combined with variation introduced through the tree-building process (e.g., tree  
132 reconstruction methods, assessment of support, etc.), can compromise the accuracy of  
133 purpose-built phylogenies. However, these issues – and others – apply also to the source trees  
134 used for synthesis-based phylogenies, although perhaps at different scales. Our aim here is to  
135 quantify the influence of the two tree construction techniques on measures of phylogenetic  
136 diversity that are commonly employed in the rapidly growing field of community phylogenetics.

## 137 **Materials and Methods**

### 138 **Purpose-built phylogenies**

139 We collected three “purpose-built” phylogenies from published and unpublished sources. The first  
140 purpose-built phylogeny is for 540 plant taxa in the globally critically imperiled pine rockland  
141 ecosystem in South Florida, USA (Trotta et al. 2018). The second phylogeny consists of 1,064 alpine  
142 plant taxa in France (Marx et al. 2017). The third purpose-built phylogeny has 1,548 plant species  
143 with distributions in Florida, USA (Allen et al. in review). All three phylogenies were estimated  
144 from sequence data and were time-calibrated (i.e., chronograms). When using time-calibrated  
145 phylogenies, phylogenetic diversity measures the amount of evolution in time-units, and this is the  
146 measure we focus on here. For details about phylogeny building processes, see the Appendix.

## 147 **Commonly available phylogenies**

148 For each of the three purpose-built phylogenies, we generated four phylogenies based on different  
149 sources with which to compare phylogenetic alpha and beta diversity. The first two were  
150 generated using Phylomatic v4.2 (Webb and Donoghue 2005) using two different backbone trees:  
151 R20120829 (APG III 2009) and zanne2014 (Zanne et al. 2014). We call the first phylogeny  
152 tree\_apg and the second one tree\_zanne. The phylogeny tree\_zanne has branch lengths  
153 because the backbone tree zanne2014 was inferred from seven gene regions for >32k plant species  
154 and was time-calibrated using ‘congruification’ (Eastman et al. 2013). In contrast, the phylogeny  
155 tree\_apg has no branch lengths and is based, not on the result of a phylogenetic analysis *per se*,  
156 but on a series of phylogenetic analyses as summarized by the Angiosperm Phylogeny Group III  
157 (2009). APG classification now updated as APG IV (2016), but Phylomatic uses APG III. To add  
158 branch lengths, we used the bladj algorithm in Phylocom (Webb et al. 2008) to convert the tree to  
159 a chronogram using a set of the minimum node ages given by Wikström et al. (2001).

160 The third phylogeny was derived from the Open Tree of Life (Hinchliff et al. 2015), a recent  
161 comprehensive phylogeny for ~ 2.3 million named species of life, including all eukaryotes, Archaea,  
162 and Bacteria. This phylogeny, which we call tree\_otl, is a supertree constructed from available  
163 source trees, with missing species added based on taxonomy; this resulting tree therefore contains  
164 many polytomies and also did not include branch lengths. To calculate branch lengths, we first  
165 identified descendants for each of the internal nodes in tree\_otl and then searched for their  
166 divergence time in the TimeTree of Life database (Kumar et al. 2017). The TimeTree database was  
167 compiled based on 3,163 studies and 97,085 species (as of October 10, 2017). For a pair of species  
168 included in this database, we extracted their average divergence time from all previous studies.  
169 Using the divergence date of internal nodes from the TimeTree database, we then determined  
170 branch lengths of tree\_otl using Phylocom (Webb et al. 2008) and its bladj function. Recently,  
171 an updated phylogeny with branch lengths for seed plants based on the Open Tree of Life was  
172 published (Smith and Brown 2018); however, we did not use this seed plant phylogeny as a source

173 because it contains only seed plants, and our purpose-built phylogenies also contain other clades  
174 of vascular plants.

175 The fourth phylogeny was a random coalescent phylogeny generated using the `rcoal` function  
176 from the R package `ape` (Paradis et al. 2004). The random tree was then scaled to have a root age  
177 that was the average root age of `tree_apg`, `tree_zanne`, and `tree_otl`. Results based on the  
178 random phylogeny should not correlate with those based on other phylogenies.

179 Not every species from the purpose-built phylogenies was found in all of the synthesis phylogenies.  
180 For the pine rockland phylogeny, 514 out of 540 species (95.2%) were found in all phylogenies. For  
181 the alpine plant phylogeny, 994 out of 1064 species (93.4%) were found in all phylogenies. For the  
182 Florida flora phylogeny, 1472 out of 1548 species (95.1%) were found in all phylogenies. Therefore,  
183 we pruned the purpose-built phylogenies to have the same species as their corresponding  
184 synthesis tree. In practice, one could insert species that were missing from the derived phylogeny  
185 as polytomies in the same genus, so that all species could be included in the analysis.

## 186 **Generation of community assemblages**

187 For each purpose-built phylogeny, we simulated 1000 presence/absence site-by-species matrices.  
188 Each matrix has 30 sites, with species within each site randomly selected from the phylogeny tips  
189 representing the species pool. We fixed species richness of each site to be 50 to remove any effects  
190 of species richness on the phylogenetic diversity measures. Without setting all sites to have the  
191 same number of species, results based on different phylogenies will correlate with each other. For  
192 example, it is likely that results from `tree_random` will be highly correlated with results from  
193 other phylogenies (Appendix Fig. A1). This is because most phylogenetic diversity metrics  
194 correlate with species richness, which, in turn, will lead to correlations among them and confound  
195 the comparisons of effects of phylogeny *per se* on the measurement of phylogenetic diversity.  
196 Removing the constraint of using the same species richness does not affect our results and



197 conclusions (Appendix Fig. A1, A2). In our current setting, the maximum total number of species  
198 across 30 sites is  $30 \times 50 = 1500$ , which is similar to the number of tips in the largest purpose-built  
199 phylogeny in our study. We selected species from the species pool randomly because previous  
200 studies demonstrated that different approaches to species selection give similar results (Swenson  
201 [2009](#)).

## 202 **Phylogenetic diversity measurements**

203 For each site-by-species matrix, we calculated alpha and beta phylogenetic diversity for each of the  
204 phylogenies using indices that are commonly used in community phylogenetic studies. For  
205 phylogenetic alpha diversity, we used Faith's PD (PD), mean pairwise distance (MPD), and mean  
206 pairwise distance between the closest relatives (MNTD). PD calculates the sum of the branch  
207 lengths of all species present in an assemblage (Faith [1992](#)). We did *not* include the root of the  
208 phylogeny when calculating PD. MPD calculates the average pairwise distance between all species,  
209 and MNTD calculates the average pairwise distance between the closest relatives in an assemblage  
210 (Webb et al. [2002](#)). We selected these three metrics for phylogenetic alpha diversity among the  
211 myriad of metrics available because they are most commonly used and represent different but  
212 complementary information about phylogenetic structure of communities (Miller et al. [2017](#),  
213 Tucker et al. [2017](#)).

214 For phylogenetic beta diversity, we applied UniFrac (Unif), inter-assemblage MPD (MPD\_beta),  
215 inter-assemblage MNTD (MNTD\_beta), and phylogenetic community dissimilarity (PCD) to all  
216 possible unique combinations of assemblage pairs. Unif is derived from the Jaccard dissimilarity  
217 index and calculates the total branch length unique to each assemblage relative to the total branch  
218 length of all species in a pair of assemblages (Lozupone and Knight [2005](#)). Therefore, it measures  
219 the fraction of evolutionary history unique to each assemblage. MPD\_beta and MNTD\_beta were  
220 derived from MPD and MNTD, respectively, but instead of comparing species within the same  
221 assemblage, they compare species from two different assemblages (Webb et al. [2008](#)). PCD

222 measures pairwise phylogenetic dissimilarity between assemblages by asking how much of the  
223 variance of values of a hypothetical trait among species in one assemblage can be predicted by the  
224 values of species from another. PCD is independent of species richness of the pair of assemblages  
225 and has relatively higher statistical power than other common metrics (Ives and Helmus 2010).

226 As PD and MNTD are both correlated with species richness (Miller et al. 2017), null models that  
227 retain species composition while randomly shuffling tips of the phylogeny are commonly used to  
228 standardize phylogenetic diversity results. Despite the fact that MPD is independent of species  
229 richness, its variance changes relative to species richness (Miller et al. 2017). Therefore, null  
230 models are also frequently applied to MPD. Using the null model, standardized effect size (SES) for  
231 each metric can be calculated as  $SES = \frac{X_{obs} - \text{mean}(X_{null})}{sd(X_{null})}$ , where  $X_{obs}$  is the observed value, and  $X_{null}$   
232 are the  $n$  values calculated based on null models. Recently, analytic solutions for the SES of  
233 phylogenetic alpha diversity metrics were developed (Tsirogiannis and Sandel 2016). The analytic  
234 solutions eliminate the need for computationally expensive simulations used to calculate SES  
235 values, especially for studies in high-diversity systems. In our simulations, because all sites have  
236 the same species richness, we expected that the SES values based on the analytic solutions would  
237 have the identical results as the observed phylogenetic diversity values for the statistical analyses  
238 we conducted (correlation and linear mixed models, see the Statistical analyses section below). Our  
239 simulations confirmed this expectation (Appendix Fig. A3-A6). No analytic solutions for the SES of  
240 Unif, MNTD\_beta, and PCD are available. However, the pairwise beta diversity metrics share the  
241 same core formula with their corresponding alpha diversity metrics. We thus expect that the  
242 results based on SES of these beta diversity metrics will be the same as those based on the observed  
243 diversity values in our simulations. Given the similarity in results between raw and standardized  
244 phylogenetic alpha diversity measures and the large computational burden of calculating SES for  
245 phylogenetic beta diversity metrics, we did not include the results for SES in this study.

## 246 **Statistical analyses**

247 We have two primary goals. First, we want to test the correlation between phylogenetic diversity  
248 values calculated from purpose-built phylogenies and those calculated from synthesis phylogenies.  
249 Second, we want to investigate whether phylogenetic diversity calculated from synthesis  
250 phylogenies over- or under-estimates phylogenetic diversity when compared to purpose-built  
251 phylogenies. For the first goal, we calculated the average Spearman's rank-based measure of the  
252 correlation between phylogenetic diversity values from all phylogenies across the 1000  
253 simulations. We used rank-based correlation because it is the relative phylogenetic diversity, not  
254 the absolute one, that we are interested in. For the second goal, we used Linear Mixed Models  
255 (LMMs) with phylogenetic diversity values from the purpose-built phylogeny as the response  
256 variable, the phylogenetic diversity values from one of the synthesis phylogenies as the predictor,  
257 and the simulation dataset as the random term. We scaled the diversity values to have mean zero  
258 and standard deviation one before fitting the models. We also forced the regression line through  
259 the origin. If the slope of the regression line is significantly different from zero, then phylogenetic  
260 diversity based on purpose-built phylogenies and synthesis phylogenies is highly correlated.  
261 Furthermore, if the slope is higher/lower than one, then the phylogenetic diversity based on the  
262 synthesis phylogenies under-/over-estimates phylogenetic diversity. For pairwise beta diversity,  
263 because of the large number of samples across all 1000 simulations ( $\binom{30}{2} \times 1000 = 435,000$ ), we  
264 randomly selected 100 simulations on which to conduct LMMs. In addition, for pairwise beta  
265 diversity, because one site can be compared with all other sites, the beta diversity values are not  
266 independent. To account for this, we included datasets, `site1` within each dataset (the first site in  
267 the site pair), and `site2` within each site (the other site in the site pair) as random terms in the  
268 LMMs (cf. Li and Waller 2017). The workflow of this study is outlined in Fig. 1. All analyses were  
269 conducted with R v3.4.3 (R Core Team 2017).

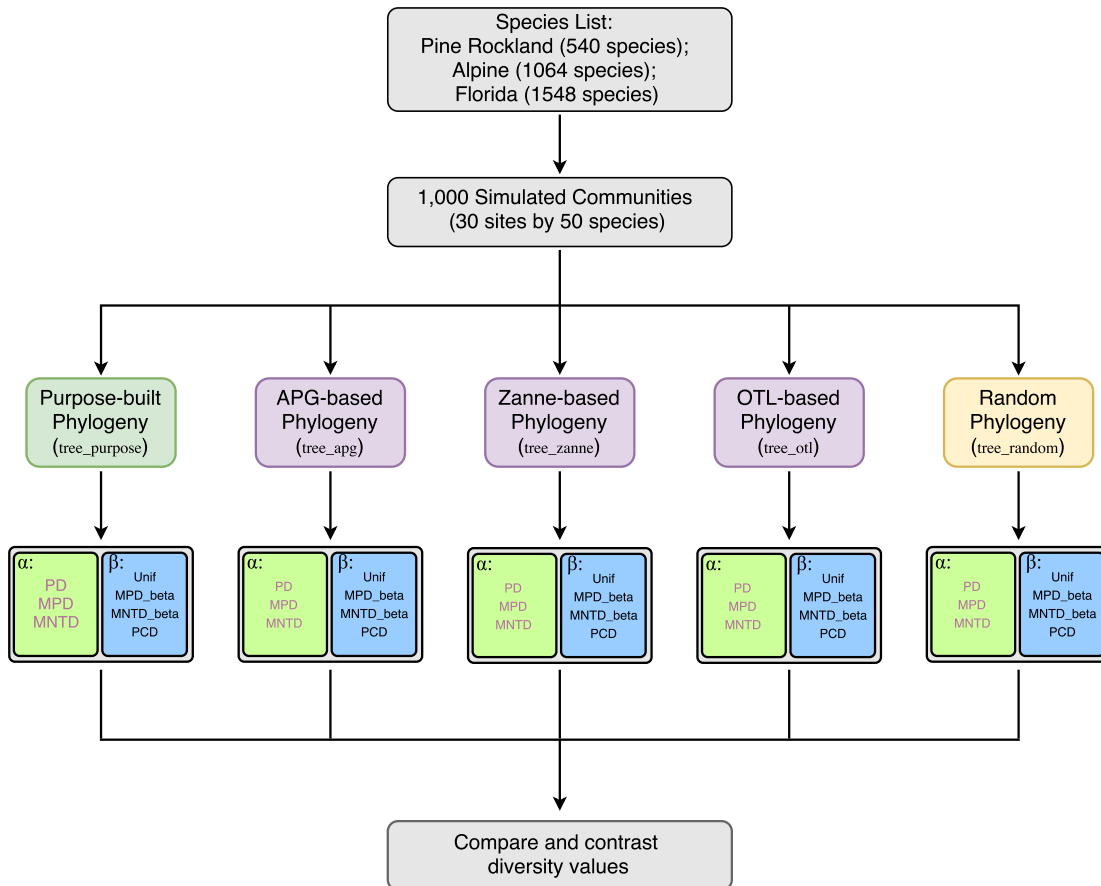

Figure 1: Workflow to assess effects of commonly used synthesis phylogenies on phylogenetic diversity estimations. Abbreviations: APG, Angiosperm Phylogeny Group; OTL, Open Tree of Life; PD, Faith's Phylogenetic diversity; MPD, Mean pairwise distance; MNTD, Mean nearest taxon distance; Unif, Unifraction; PCD, Phylogenetic community dissimilarity.

## 270 **Results**

### 271 **Alpha diversity**

272 Phylogenetic alpha diversity (PD, MPD, and MNTD) values calculated with different phylogenies  
273 (tree\_purpose, tree\_apg, tree\_zanne, and tree\_otl) were highly correlated. The median  
274 Spearman's correlation of the 1000 simulations was larger than 0.63 across all comparisons ( $p <$   
275  $0.05$  for all simulations and comparisons; Fig. 2). In most cases, the median Spearman's correlation  
276 was larger than 0.85, especially for PD and MPD. Therefore, PD and MPD were more robust to  
277 varying the source of the phylogeny than MNTD. Across all comparisons, diversity values based  
278 on tree\_otl showed the highest correlations with those based on tree\_purpose, with an average  
279 correlation across all comparisons of 0.902. As expected, diversity values based on the random  
280 phylogeny tree\_random were not correlated with diversity values based on other phylogenies,  
281 with median Spearman's correlations close to zero (Fig. 2).

282 The slopes of linear mixed models (LMM) were all less than one (Table 1), suggesting that diversity  
283 values based on synthesis phylogenies generally over-estimated the diversity values based on the  
284 purpose-built phylogenies. The PD metrics based on the Open Tree of Life phylogeny (tree\_otl)  
285 had estimates closest to those calculated from the purpose-built phylogenies (Table 1).

### 286 **Beta diversity**

287 The phylogenetic beta diversity results (Unfi, MPD\_beta, MNTD\_beta, and PCD) show a similar  
288 pattern to the alpha diversity results. Beta diversity of community pairs based on different  
289 phylogenies was also highly correlated, with the median Spearman's correlation from the 1000  
290 simulations greater than 0.69 across all comparisons (Fig. 3). Overall, phylogenetic beta diversity is  
291 more sensitive to the source of the phylogeny than alpha diversity. MPD\_beta is the most robust  
292 beta diversity metric to the source of the phylogeny, followed by MNTD\_beta, Unif, and PCD.

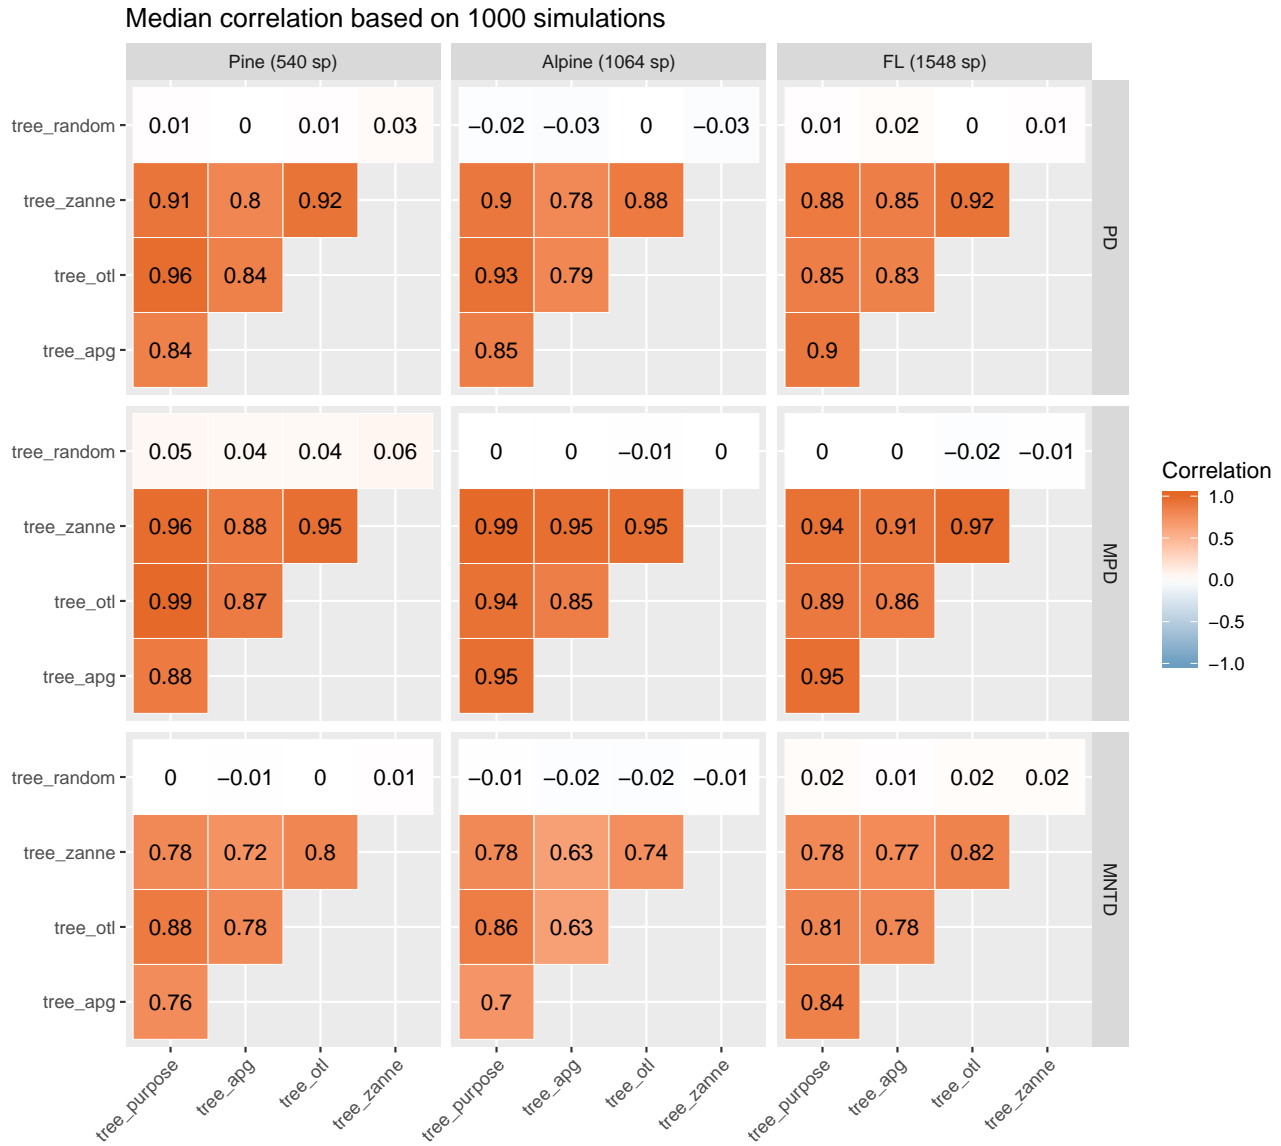

Figure 2: Median correlations of phylogenetic alpha diversity values based on different phylogenies.

Table 1: Slopes based on linear mixed models (LMMs). Within the model, the response variable is the phylogenetic alpha diversity values based on the purpose-built phylogeny; the predictor is the phylogenetic alpha diversity values based on one of the synthesis phylogenies (tree\_apg, tree\_zanne, tree\_otl, and tree\_random). Therefore, slopes less than one indicate overestimations. Numbers within parentheses are the 95% confidence intervals for the slopes.

| index | dataset          | tree_apg             | tree_zanne           | tree_otl             | tree_random             |
|-------|------------------|----------------------|----------------------|----------------------|-------------------------|
| PD    | Pine (540 sp)    | 0.843 (0.837, 0.849) | 0.917 (0.913, 0.922) | 0.971 (0.969, 0.974) | -0.001 (-0.013, 0.01)   |
| PD    | Alpine (1064 sp) | 0.854 (0.848, 0.86)  | 0.915 (0.91, 0.919)  | 0.937 (0.933, 0.941) | -0.022 (-0.034, -0.01)  |
| PD    | FL (1548 sp)     | 0.92 (0.916, 0.924)  | 0.891 (0.886, 0.896) | 0.871 (0.865, 0.876) | 0.006 (-0.005, 0.018)   |
| MPD   | Pine (540 sp)    | 0.891 (0.885, 0.896) | 0.972 (0.969, 0.974) | 0.996 (0.995, 0.997) | 0.047 (0.036, 0.059)    |
| MPD   | Alpine (1064 sp) | 0.957 (0.954, 0.96)  | 0.997 (0.997, 0.998) | 0.941 (0.937, 0.945) | 0.004 (-0.008, 0.015)   |
| MPD   | FL (1548 sp)     | 0.962 (0.958, 0.965) | 0.95 (0.946, 0.953)  | 0.895 (0.889, 0.9)   | -0.002 (-0.014, 0.009)  |
| MNTD  | Pine (540 sp)    | 0.78 (0.773, 0.788)  | 0.787 (0.78, 0.794)  | 0.897 (0.892, 0.902) | 0.006 (-0.006, 0.017)   |
| MNTD  | Alpine (1064 sp) | 0.713 (0.705, 0.721) | 0.794 (0.787, 0.801) | 0.874 (0.869, 0.88)  | -0.016 (-0.028, -0.004) |
| MNTD  | FL (1548 sp)     | 0.856 (0.85, 0.862)  | 0.797 (0.79, 0.804)  | 0.831 (0.824, 0.837) | 0.03 (0.018, 0.041)     |

293 Again, PD metrics based on tree\_otl showed the highest correlation with metrics based on the  
 294 purpose-built tree, followed by tree\_zanne and tree\_apg. Beta diversity values based on  
 295 tree\_random did not correlate with values based on any other phylogeny.

296 The slopes of LMMs were generally less than one (Table 2), suggesting over-estimates of beta  
 297 diversity from the synthesis-based phylogenies compared with the purpose-built phylogenies.  
 298 However, slopes for MPD\_beta values based on tree\_otl were all greater than one, suggesting  
 299 that beta PD metrics were under-estimated when compared to those calculated from the  
 300 purpose-built trees. Metrics based on tree\_zanne for the flora of Florida dataset were also  
 301 under-estimated (Table 2). For the other beta diversity metrics (i.e., Unif, MNTD\_beta, and PCD),  
 302 tree\_otl generally gave results closer to those based on the purpose-built trees than did the other  
 303 synthesis-based phylogenies.

## 304 Discussion

305 We examined how different phylogenies, purpose-built and synthesis-based, influenced  
 306 phylogenetic alpha and beta diversity measures commonly used in community phylogenetic

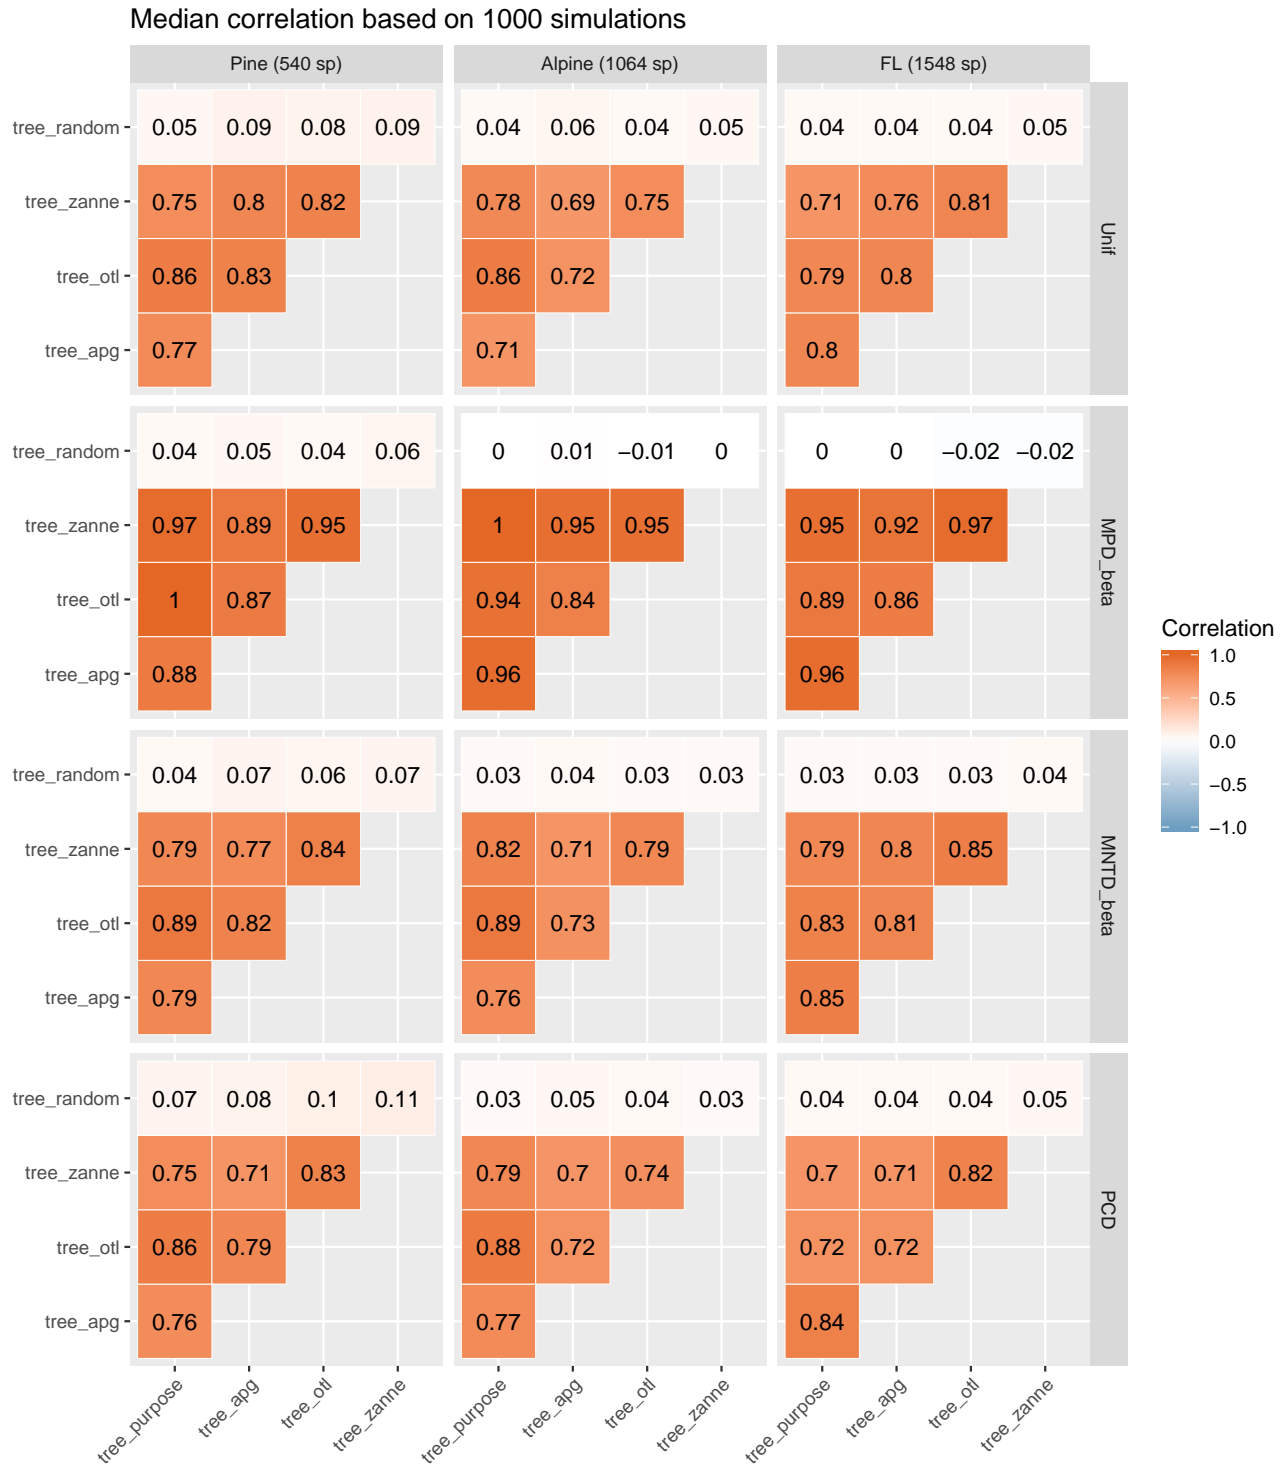

Figure 3: Median correlations of phylogenetic beta diversity values based on different phylogenies.



Table 2: Slopes based on linear mixed models (LMMs). Within the model, the response variable is the phylogenetic beta diversity values based on the purpose-built phylogeny; the predictor is the phylogenetic beta diversity values based on one of the synthesis phylogenies (tree\_apg, tree\_zanne, tree\_otl, and tree\_random). Therefore, slopes less than one indicate overestimations, and slopes greater than one are underestimates. Numbers within parentheses are the 95% confidence intervals for the slopes.

| index     | dataset          | tree_apg             | tree_zanne           | tree_otl             | tree_random            |
|-----------|------------------|----------------------|----------------------|----------------------|------------------------|
| Unif      | Pine (540 sp)    | 0.823 (0.816, 0.83)  | 0.791 (0.785, 0.797) | 0.87 (0.866, 0.875)  | 0.054 (0.04, 0.067)    |
| Unif      | Alpine (1064 sp) | 0.806 (0.798, 0.815) | 0.87 (0.863, 0.876)  | 0.895 (0.89, 0.9)    | 0.063 (0.052, 0.074)   |
| Unif      | FL (1548 sp)     | 0.871 (0.865, 0.877) | 0.792 (0.785, 0.8)   | 0.815 (0.809, 0.822) | 0.065 (0.052, 0.078)   |
| MPD_beta  | Pine (540 sp)    | 0.343 (0.336, 0.35)  | 0.967 (0.959, 0.975) | 1.249 (1.234, 1.263) | 0.011 (0.004, 0.017)   |
| MPD_beta  | Alpine (1064 sp) | 0.801 (0.794, 0.807) | 0.977 (0.975, 0.98)  | 1.12 (1.104, 1.137)  | 0.002 (-0.002, 0.006)  |
| MPD_beta  | FL (1548 sp)     | 0.788 (0.78, 0.797)  | 1.347 (1.331, 1.363) | 1.815 (1.787, 1.842) | -0.003 (-0.007, 0.001) |
| MNTD_beta | Pine (540 sp)    | 0.855 (0.846, 0.864) | 0.854 (0.846, 0.862) | 0.931 (0.926, 0.937) | 0.049 (0.038, 0.061)   |
| MNTD_beta | Alpine (1064 sp) | 0.891 (0.883, 0.9)   | 0.948 (0.941, 0.955) | 0.94 (0.935, 0.945)  | 0.062 (0.051, 0.073)   |
| MNTD_beta | FL (1548 sp)     | 0.788 (0.782, 0.793) | 0.759 (0.752, 0.765) | 0.752 (0.746, 0.758) | 0.035 (0.024, 0.045)   |
| PCD       | Pine (540 sp)    | 0.855 (0.847, 0.864) | 0.836 (0.827, 0.846) | 0.876 (0.869, 0.884) | 0.083 (0.07, 0.095)    |
| PCD       | Alpine (1064 sp) | 0.824 (0.816, 0.832) | 0.909 (0.9, 0.918)   | 0.905 (0.898, 0.911) | 0.076 (0.065, 0.088)   |
| PCD       | FL (1548 sp)     | 0.805 (0.798, 0.812) | 0.755 (0.747, 0.763) | 0.727 (0.718, 0.735) | 0.052 (0.039, 0.066)   |

307 analyses. We found two main results. First, the synthesis phylogenies generally over-estimated  
308 phylogenetic diversity compared with purpose-built phylogenies. This is not surprising because  
309 synthesis phylogenies generally have higher proportions of polytomies than purpose-built ones,  
310 which, in turn, leads to larger distances between species within these polytomies. This result  
311 agrees with Boyle and Adamowicz (2015) and Qian and Zhang (2016) but contradicts Swenson  
312 (2009), who found that phylogenies with more polytomies under-estimated phylogenetic diversity.  
313 Second, phylogenetic diversity values calculated from synthesis trees were highly correlated with  
314 those based on purpose-built phylogenies, even if they were over-estimated. These results hold for  
315 both alpha and beta diversity and for phylogenies with different numbers of tips. While our study  
316 focuses on plants, we expect that our results will generalize to any taxonomic group. Therefore,  
317 phylogenies derived from synthesis trees can provide similar results to purpose-built phylogenies  
318 while saving effort and time when quantifying and comparing phylogenetic diversity of  
319 communities.

320 One main reason for this conclusion is that, as ecologists and conservation biologists, we mostly  
321 care about the relative diversity among communities instead of their absolute diversity. For

322 example, for a set of communities within one region, we may be interested in which communities  
323 have the highest/lowest phylogenetic diversity. The absolute phylogenetic diversity of each  
324 community does not mean much without comparing it to other communities. Because  
325 phylogenetic values based on different phylogenies are highly correlated with each other, the  
326 information available for community phylogenetic questions does not differ much between  
327 approaches. Even though such synthesis phylogenies may over-estimate absolute phylogenetic  
328 diversity for communities, the relative phylogenetic diversity among communities will be similar  
329 to those calculated from typically better resolved but less accessible phylogenies. Based on the  
330 information provided by relative values of phylogenetic diversity, the potential improved  
331 resolution of purpose-built trees for calculating the absolute PD may not be worth the effort for  
332 community phylogenetic questions.

333 Our finding that phylogenetic diversity metrics are relatively insensitive to the phylogenies from  
334 which they are derived has been supported by other recent studies. For example, using simulated  
335 fully bifurcating and gradually unresolved phylogenies, Swenson (2009) found that phylogenetic  
336 diversity measures are generally robust to the uncertainty of the phylogenies, especially if the  
337 uncertainty is concentrated in recent nodes of the phylogeny. Using multiple posterior  
338 phylogenies of bats, Patrick and Stevens (2014) rearranged branches across these phylogenies and  
339 also found that phylogenetic diversity measures are robust to the phylogenies from which they are  
340 calculated. More recently, Cadotte (2015) transformed a phylogeny with different evolution models  
341 and found that phylogenetic diversity measures are insensitive to the branch lengths of the  
342 phylogeny; getting the topology right is more important when calculating phylogenetic diversity.  
343 Qian and Zhang (2016) found similar phylogenetic diversity values of the angiosperm tree flora of  
344 North America based on phylogenies derived from Zanne et al. (2014) and Phylomatic (Webb and  
345 Donoghue 2005). These studies, however, only focused on alpha diversity. Our study extends the  
346 literature by also examining the effects of phylogenies on beta diversity. We found the same  
347 pattern for beta diversity and alpha diversity. Taken together, a general pattern emerges:  
348 community phylogenetic alpha and beta diversity metrics are robust to reasonably good modern

349 phylogenies.

350 Why are phylogenetic diversity values from purpose-built and synthesis phylogenies highly  
351 correlated? There are two possible reasons. First, both purpose-built and synthesis phylogenies  
352 likely share a similar systematic backbone and empirical resources such as genes, taxonomies, and  
353 expert knowledge. This guarantees that phylogenetic diversity based on these phylogenies will not  
354 be dramatically different. Second, phylogenetic diversity metrics aggregate (by summing or  
355 averaging) all information into one value for each site, which could help buffer most uncertainty  
356 and further mask most of the differences between different phylogenies.

357 Our results should encourage ecologists to increasingly include phylogenetic analyses in  
358 community ecology studies given the growing accessibility of synthesis phylogenies and the  
359 robustness of phylogenetic diversity measures based on them. However, our results should not  
360 discourage the construction of purpose-built phylogenies, which are clearly valuable for many  
361 ecological and evolutionary questions. This is especially the case for purpose-built trees  
362 constructed from local DNA samples. The sequencing of species in a given community can yield  
363 data for species that have never been sequenced before. These new sequences can then be  
364 incorporated into synthesis trees, improving their resolution for future research. Direct  
365 sequencing of samples collected for a community is also important when the community contains  
366 un-described (Pons et al. 2006) or cryptic species (Hebert et al. 2004). Furthermore, for many  
367 taxonomic groups, synthesis trees are not available or are far too poorly sampled, and constructing  
368 purpose-built trees is the only approach possible for community phylogenetic analyses.

## 369 **Conclusion**

370 Community phylogenetics is rapidly becoming an important component of community ecology,  
371 macroecology, and biodiversity conservation (Webb et al. 2002, Vamosi et al. 2009). For  
372 calculations and comparisons of phylogenetic diversity of communities, an important question

373 arises: can we derive phylogenies from already-available synthesis trees, or should we generate  
374 our own purpose-built phylogenies? Our results suggest that phylogenies derived from common  
375 synthesis trees over-estimate phylogenetic diversity metrics when compared to purpose-built trees,  
376 but values of phylogenetic diversity are highly correlated with purpose-built metrics. Particularly,  
377 the Open Tree of Life, which includes all major phylogenetic groups (e.g. plants, birds, fishes,  
378 mammals, fungi, Archaea, Bacteria, etc.), produced the most similar values of phylogenetic  
379 diversity when compared to metrics derived from purpose-built trees. Furthermore, a recently  
380 updated Open Tree of Life phylogeny for seed plants has branch lengths calculated based on  
381 molecular data (Smith and Brown 2018). With new data and studies continuously being integrated  
382 into synthesis trees such as the Open Tree of Life, these resources are poised to continue to  
383 improve rapidly. As a result, for comparing phylogenetic diversity among communities, we  
384 recommend taking advantage of recent well-developed products such as the Open Tree of Life.

## 385 **Data Accessibility**

386 All phylogenies and R code used will be uploaded to figshare upon acceptance.

## 387 **Acknowledgments**

388 This study was supported by NSF grants ABI-458034 to BB, DEB-1442280 and DBI-1458640 to PSS  
389 and DES, EF-1115210 and DBI-1547229 to PSS, and EF-1550838 (supported HEM).

## References

- 390
- 391 Antonelli, A. et al. 2017. Toward a self-updating platform for estimating rates of speciation and  
392 migration, ages, and relationships of taxa. - *Systematic biology* 66: 152–166.
- 393 APG III 2009. An update of the angiosperm phylogeny group classification for the orders and  
394 families of flowering plants: APG iii. - *Botanical Journal of the Linnean Society* 161: 105–121.
- 395 APG IV et al. 2016. An update of the angiosperm phylogeny group classification for the orders and  
396 families of flowering plants: APG iv. - *Botanical Journal of the Linnean Society* 181: 1–20.
- 397 Baum, D. A. and Smith, S. D. 2012. *Tree thinking: An introduction to phylogenetic biology.* -  
398 Roberts; Co., Greenwood Village, CO.
- 399 Bininda-Emonds, O. R. et al. 2007. The delayed rise of present-day mammals. - *Nature* 446: 507.
- 400 Boyle, E. E. and Adamowicz, S. J. 2015. Community phylogenetics: Assessing tree reconstruction  
401 methods and the utility of dna barcodes. - *PloS one* 10: e0126662.
- 402 Cadotte, M. W. 2015. Phylogenetic diversity–ecosystem function relationships are insensitive to  
403 phylogenetic edge lengths. - *Functional Ecology* 29: 718–723.
- 404 Cardillo, M. 2011. Phylogenetic structure of mammal assemblages at large geographical scales:  
405 Linking phylogenetic community ecology with macroecology. - *Philosophical Transactions of the*  
406 *Royal Society B: Biological Sciences* 366: 2545–2553.
- 407 Cavender-Bares, J. et al. 2006. Phylogenetic structure of floridian plant communities depends on  
408 taxonomic and spatial scale. - *Ecology* 87: S109–S122.
- 409 Drummond, A. J. and Rambaut, A. 2007. BEAST: Bayesian evolutionary analysis by sampling trees.  
410 - *BMC evolutionary biology* 7: 214.
- 411 Eastman, J. M. et al. 2013. Congruification: Support for time scaling large phylogenetic trees. -

- 412 Methods in Ecology and Evolution 4: 688–691.
- 413 Edgar, R. C. 2004. MUSCLE: Multiple sequence alignment with high accuracy and high throughput.  
414 - Nucleic acids research 32: 1792–1797.
- 415 Faith, D. P. 1992. Conservation evaluation and phylogenetic diversity. - Biological conservation 61:  
416 1–10.
- 417 Forest, F. et al. 2007. Preserving the evolutionary potential of floras in biodiversity hotspots. -  
418 Nature 445: 757–760.
- 419 Fritz, S. A. et al. 2009. Geographical variation in predictors of mammalian extinction risk: Big is  
420 bad, but only in the tropics. - Ecology letters 12: 538–549.
- 421 Hebert, P. D. et al. 2004. Ten species in one: DNA barcoding reveals cryptic species in the  
422 neotropical skipper butterfly *astrartes fulgerator*. - Proceedings of the National Academy of  
423 Sciences of the United States of America 101: 14812–14817.
- 424 Helmus, M. R. et al. 2007. Separating the determinants of phylogenetic community structure. -  
425 Ecology letters 10: 917–925.
- 426 Hinchliff, C. E. et al. 2015. Synthesis of phylogeny and taxonomy into a comprehensive tree of life.  
427 - Proceedings of the National Academy of Sciences 112: 12764–12769.
- 428 Ives, A. R. and Helmus, M. R. 2010. Phylogenetic metrics of community similarity. - The American  
429 Naturalist 176: E128–E142.
- 430 Jetz, W. et al. 2012. The global diversity of birds in space and time. - Nature 491: 444–448.
- 431 Kumar, S. et al. 2017. TimeTree: A resource for timelines, timetrees, and divergence times. -  
432 Molecular Biology and Evolution 34: 1812–1819.
- 433 Lanfear, R. et al. 2012. PartitionFinder: Combined selection of partitioning schemes and

- 434 substitution models for phylogenetic analyses. - *Molecular biology and evolution* 29: 1695–1701.
- 435 Lavergne, S. et al. 2010. Biodiversity and climate change: Integrating evolutionary and ecological  
436 responses of species and communities. - *Annual review of ecology, evolution, and systematics* 41:  
437 321–350.
- 438 Li, D. and Waller, D. M. 2017. Fire exclusion and climate change interact to affect long-term changes  
439 in the functional composition of plant communities. - *Diversity and Distributions* 23: 496–506.
- 440 Li, D. et al. 2017. Can functional traits account for phylogenetic signal in community composition?  
441 - *New Phytologist* 214: 607–618.
- 442 Lozupone, C. and Knight, R. 2005. UniFrac: A new phylogenetic method for comparing microbial  
443 communities. - *Applied and environmental microbiology* 71: 8228–8235.
- 444 Maherali, H. and Klironomos, J. N. 2007. Influence of phylogeny on fungal community assembly  
445 and ecosystem functioning. - *science* 316: 1746–1748.
- 446 Marx, H. E. et al. 2017. Riders in the sky (islands): Using a mega-phylogenetic approach to  
447 understand plant species distribution and coexistence at the altitudinal limits of angiosperm plant  
448 life. - *Journal of biogeography* 44: 2618–2630.
- 449 Miller, E. T. et al. 2017. Phylogenetic community structure metrics and null models: A review with  
450 new methods and software. - *Ecography* 40: 461–477.
- 451 Paradis, E. et al. 2004. APE: Analyses of phylogenetics and evolution in R language. -  
452 *Bioinformatics* 20: 289–290.
- 453 Park, D. S. et al. 2018. Taxon sampling effects on the quantification and comparison of community  
454 phylogenetic diversity. - *Molecular ecology* in press.
- 455 Patrick, L. E. and Stevens, R. D. 2014. Investigating sensitivity of phylogenetic community  
456 structure metrics using north american desert bats. - *Journal of Mammalogy* 95: 1240–1253.

457 Pearse, W. D. and Purvis, A. 2013. PhyloGenerator: An automated phylogeny generation tool for  
458 ecologists. - *Methods in Ecology and Evolution* 4: 692–698.

459 Pons, J. et al. 2006. Sequence-based species delimitation for the dna taxonomy of undescribed  
460 insects. - *Systematic biology* 55: 595–609.

461 Qian, H. and Zhang, J. 2016. Are phylogenies derived from family-level supertrees robust for  
462 studies on macroecological patterns along environmental gradients? - *Journal of systematics and*  
463 *evolution* 54: 29–36.

464 Rabosky, D. L. et al. 2013. Rates of speciation and morphological evolution are correlated across  
465 the largest vertebrate radiation. - *Nature communications* in press.

466 R Core Team 2017. R: A language and environment for statistical computing. - R Foundation for  
467 Statistical Computing.

468 Ronquist, F. and Huelsenbeck, J. P. 2003. MrBayes 3: Bayesian phylogenetic inference under mixed  
469 models. - *Bioinformatics* 19: 1572–1574.

470 Smith, S. A. and Brown, J. W. 2018. Constructing a broadly inclusive seed plant phylogeny. -  
471 *American journal of botany* 105: 302–314.

472 Smith, S. A. et al. 2009. Mega-phylogeny approach for comparative biology: An alternative to  
473 supertree and supermatrix approaches. - *BMC evolutionary biology* 9: 37.

474 Smith, M. A. et al. 2014. Diversity and phylogenetic community structure of ants along a costa  
475 rican elevational gradient. - *Ecography* 37: 720–731.

476 Stamatakis, A. 2014. RAxML version 8: A tool for phylogenetic analysis and post-analysis of large  
477 phylogenies. - *Bioinformatics* 30: 1312–1313.

478 Swenson, N. G. 2009. Phylogenetic resolution and quantifying the phylogenetic diversity and  
479 dispersion of communities. - *PloS one* 4: e4390.



- 480 Trotta, L. et al. 2018. Community phylogeny of the globally critically imperiled pine rockland  
481 ecosystem. - *American journal of botany* in press.
- 482 Tsirogiannis, C. and Sandel, B. 2016. PhyloMeasures: A package for computing phylogenetic  
483 biodiversity measures and their statistical moments. - *Ecography* 39: 709–714.
- 484 Tucker, C. M. et al. 2017. A guide to phylogenetic metrics for conservation, community ecology  
485 and macroecology. - *Biological Reviews* 92: 698–715.
- 486 Vamosi, S. et al. 2009. Emerging patterns in the comparative analysis of phylogenetic community  
487 structure. - *Molecular ecology* 18: 572–592.
- 488 Webb, C. O. and Donoghue, M. J. 2005. Phylomatic: Tree assembly for applied phylogenetics. -  
489 *Molecular Ecology Resources* 5: 181–183.
- 490 Webb, C. O. et al. 2002. Phylogenies and community ecology. - *Annual review of ecology and*  
491 *systematics* 33: 475–505.
- 492 Webb, C. O. et al. 2008. Phylocom: Software for the analysis of phylogenetic community structure  
493 and trait evolution. - *Bioinformatics* 24: 2098–2100.
- 494 Wikström, N. et al. 2001. Evolution of the angiosperms: Calibrating the family tree. - *Proceedings*  
495 *of the Royal Society of London B: Biological Sciences* 268: 2211–2220.
- 496 Zanne, A. E. et al. 2014. Three keys to the radiation of angiosperms into freezing environments. -  
497 *Nature* 506: 89–92.
