# Supplementary material for: For common community phylogenetic analyses, go ahead and use synthesis phylogenies
Source: bioRxiv or medRxiv preprint supplement (doi:10.1101/370353), 2019-05-06
Supplement: Supplementary file [file 370353-1.pdf]

# Appendix

*Daijiang Li, Lauren Trotta, Hannah E. Marx, Julie M. Allen, Miao Sun, Douglas E. Soltis, Pamela S. Soltis, Robert P. Guralnick, and Benjamin Baiser*

2018-07-16 11:19:39

## **Text A1: details about the three purpose-built phylogenies used**

### **Pine Rockland community phylogeny**

The pine rockland community phylogeny was constructed from a combination of field and herbarium based collections and supplemented with pre-existing sequences from the Flora of Florida project at the University of Florida. The Floristic Inventory of South Florida (FISF), which includes a comprehensive list of pine rockland species (n = 592, Gann GD 2018), guided our sampling efforts. Specimens were collected in fruit or flower over the course of all seasons and across multiple pine rockland fragments in Miami Dade County from 2014 to 2016. We collected material from 331 new field collections, 17 herbarium collections at Fairchild Tropical Botanic Garden (FTBG; Miami, FL, USA) or the University of Florida (FLAS; Gainesville, FL, USA), and 58 field-collected plants currently in cultivation at Fairchild Tropical Botanic Garden. For field and herbarium collections, we extracted total genomic DNA and amplified three commonly used plastid barcodes (Kress et al. 2009): *rbcL*, *matK*, and *psbA-trnH*. Amplification success was confirmed with gel electrophoresis and Sanger sequencing was performed by Beckman Coulter Genomics (Cambridge, Massachusetts, USA), Genewiz (South Plainfield, New Jersey, USA), or

21 Eurofins Genomics (Louisville, Kentucky, USA). In all, we were able to include 540 taxa in our  
22 community phylogeny, 90.88% of all vascular plants that occur on the FISF species list.

23 Both newly generated and pre-existing sequences were edited and assembled using Geneious R9  
24 (Biomatters, Auckland, New Zealand), and resulting alignments were constructed using the  
25 MAFFT v1.3.5 (Kato and Standley 2013) plugin in Geneious. We visually inspected individual  
26 alignments before concatenating all three loci into a final alignment. We used PartitionFinder  
27 v1.1.1 (Lanfear et al. 2012) and the Akaike information criterion (AIC) to determine the optimal  
28 model of evolution for each barcode as well as the best overall partitioning scheme, which were  
29 used for all down stream Maximum likelihood (ML) and Bayesian Inference (BI) analyses. We  
30 conducted all analyses on the HiPerGator 2.0 supercomputing cluster at the University of Florida.  
31 ML analysis was performed in RAxML v8.2.8 (Stamatakis 2014) with an ordinal level topological  
32 constraint, following the Angiosperm Phylogeny Group IV (APG IV et al. 2016) for flowering  
33 plants and the Pteridophyte Phylogeny Group (Schneider et al. 2016) for ferns and lycophytes. One  
34 thousand bootstrap replicates were used to determined clade support. We used a single lycophyte  
35 species (*Selaginella eatonii*) as the outgroup. Dating analysis was performed in BEAST 2.4.6  
36 (Bouckaert et al. 2014). Our BEAST analysis included nine fossil constraints selected from previous  
37 molecular dating studies in addition to ordinal and superclade constraints sensu APG IV  
38 (Schuettpelez and Pryer 2009, Bell et al. 2010, Magallón et al. 2013, APG IV et al. 2016). The tree  
39 topology that resulted from our ML search was used as the starting tree for this analysis after it  
40 was calibrated to match the fossil constraints using the chronos function in the R package ape  
41 (Paradis et al. 2004). More details about all included analyses can be found in Trotta et al. (2018).

## 42 **Alpine community phylogeny**

43 For each of the species occurring in the Écrins National Park, France (n = 1,345), we used the  
44 PHLAWD pipeline (Smith et al. 2009) to retrieve sequence data for five gene regions (*atpB*, *rbcl*,  
45 *matK*, *trnTLF*, and *ITS*) from GenBank (release 209). Sites that were missing across >50% of the taxa

46 in the output alignment were removed from each gene region using PHYUTILITY (Smith and  
47 Dunn 2008), and maximum likelihood (ML) inference implemented in RAxML (Stamatakis 2014)  
48 was used to estimate gene trees. Outlier taxa (i.e. those falling outside of clades defined by the APG  
49 III taxonomy) were identified by visual inspection of each gene tree and were removed before  
50 concatenation into a final alignment using PHYUTILITY (Smith and Dunn 2008). The resulting  
51 super-matrix consisted of 79% (n = 1,065) of the species surveyed and was used to estimate a ML  
52 community phylogeny of the Écrins flora in RAxML v8.0.4, under a GTR-CAT model of nucleotide  
53 evolution with simultaneous rapid bootstrap and ML search using 999 replicates, which is ideal for  
54 large nucleotide alignments (Stamatakis 2014). We used the ‘congruification’ approach (Eastman et  
55 al. 2013) to map divergence times from a reference time-tree (Soltis et al. 2011, Zanne et al. 2014)  
56 with concordant nodes on the best ML estimate of tree topology in the R package *geiger* v2.0.6  
57 (Pennell et al. 2014), and the phylogeny was scaled to time using *treePL* (Smith and O’Meara 2012).  
58 Further details can be found in Marx et al. (2017).

## 59 **Florida Flora phylogeny**

60 We constructed a phylogeny for the vascular flora of Florida based on sequence data of two plastid  
61 genes commonly used in plant phylogenetics: *rbcL* and *matK*. We first leveraged existing published  
62 sequence data on GenBank. We obtained sequence data from GenBank for 463 species. We  
63 checked these sequences throughout the alignment and tree-building process and removed  
64 problematic sequences. The remaining species lacked published DNA sequence data. We thus  
65 collected fresh materials of these species and sequenced them and deposited voucher specimens at  
66 the University of Florida herbarium (FLAS). For rare and hard-to-access species, we sampled  
67 specimens from FLAS. We aligned sequences of *rbcL* and *matK* according to a reference  
68 protein-coding sequence using Pal2Nal (Suyama et al. 2006). We used PartitionFinder v1.1.1 and  
69 AIC (Lanfear et al. 2012) to determine the optimal model of evolution. We then ran RAxML v7.03  
70 (Stamatakis 2014) on the partitioned dataset. We used 100 bootstrap replicates to determine the

71 internal support for the initial tree evaluation. We used three outgroup taxa using data from  
72 GenBank: *Physcomitrella patens* (Funariaceae), *Syntrichia ruralis* (Pottiaceae), and *Mastigophora*  
73 *woodsii* (Mastigophoraceae). We examined all phylogenetic trees for issues including possible  
74 misidentifications of species, contaminants, and misplaced taxa. We used the best tree from  
75 RAxML as a starting tree in a Bayesian analysis using MrBayes v3.2.2 (Ronquist et al. 2012) for  $10^6$   
76 generations with 20 independent runs. The top 10 trees were sampled based on likelihood score as  
77 representations of the posterior distribution of trees. We used the tree with the highest likelihood  
78 in this study. We dated the tree, producing a chronogram, using r8s (Sanderson 2003) and 17  
79 calibration points with a maximum age of 377 million years. More details about the phylogeny  
80 building process can be found in Allen et al. (*in review*).

## 81 **Figures**

Median correlation based on 100 simulations; dataset pine rockland

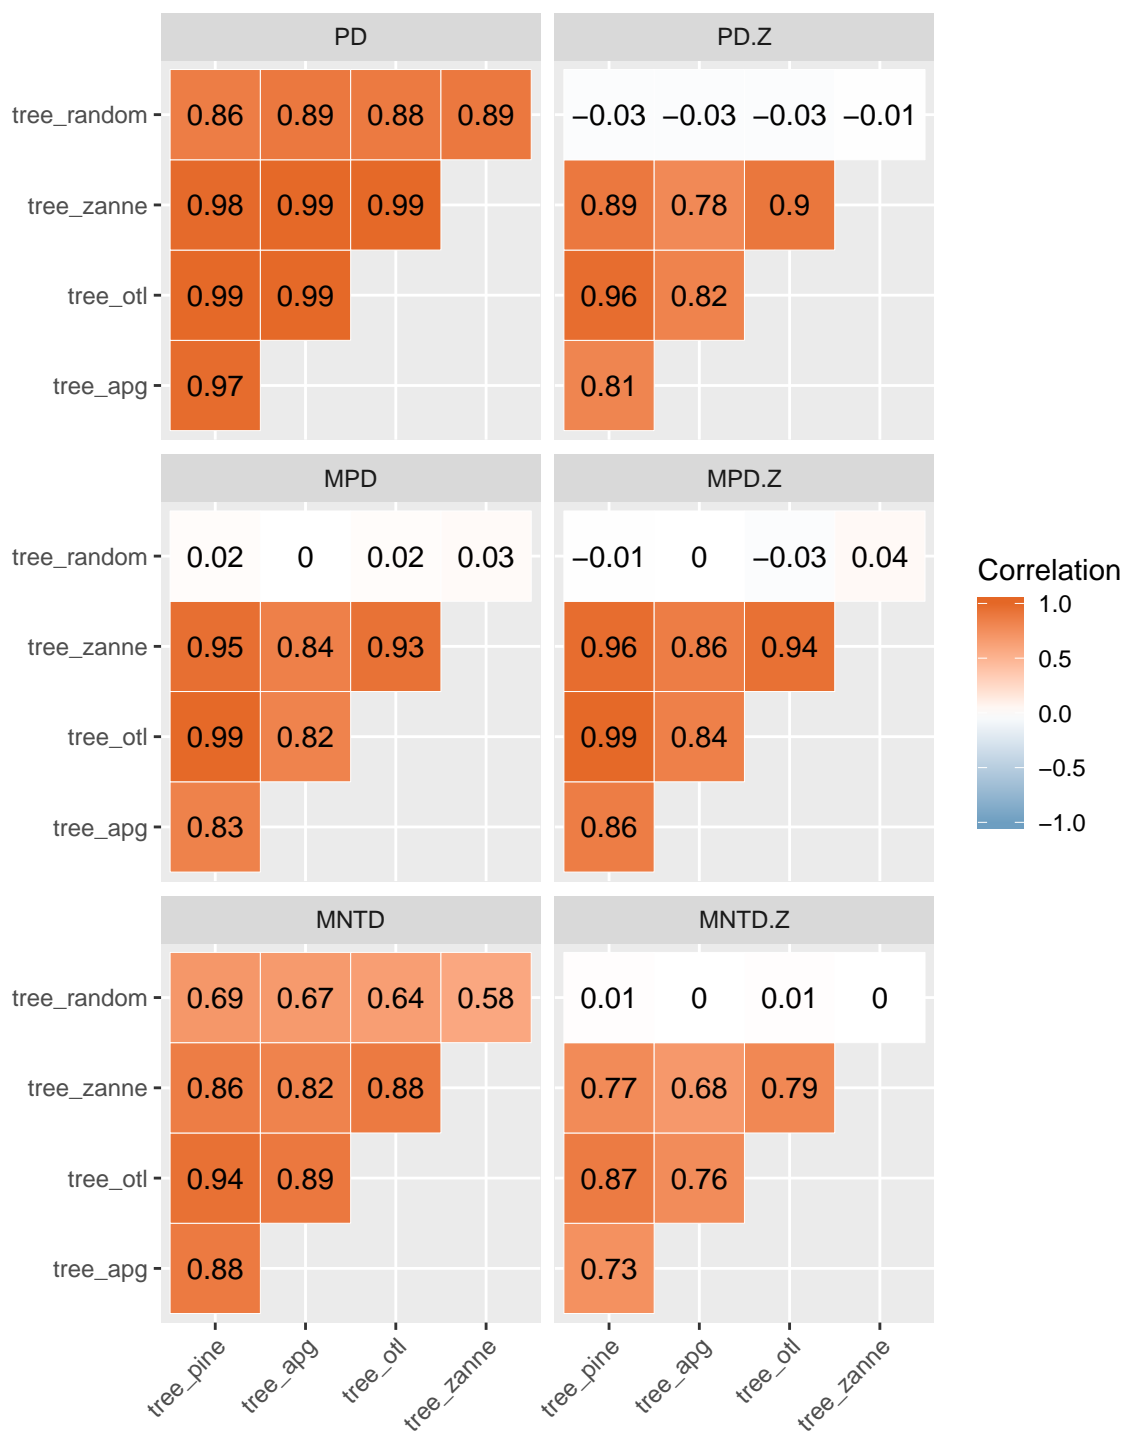

FIGURE A1: Median correlations of phylogenetic alpha diversity values based on 100 simulations of the pine rockland dataset. Within each simulation, different sites have *different* species richness. Results are similar to those in the main text, where species richness was the same across all sites within each simulation to remove effects of species richness. Note that PD and MNTD (but not MPD) are correlated with species richness, thus the high correlations between tree\_random and other phylogenies. Null models successfully removed these correlations (PD.Z and MNTD.Z).

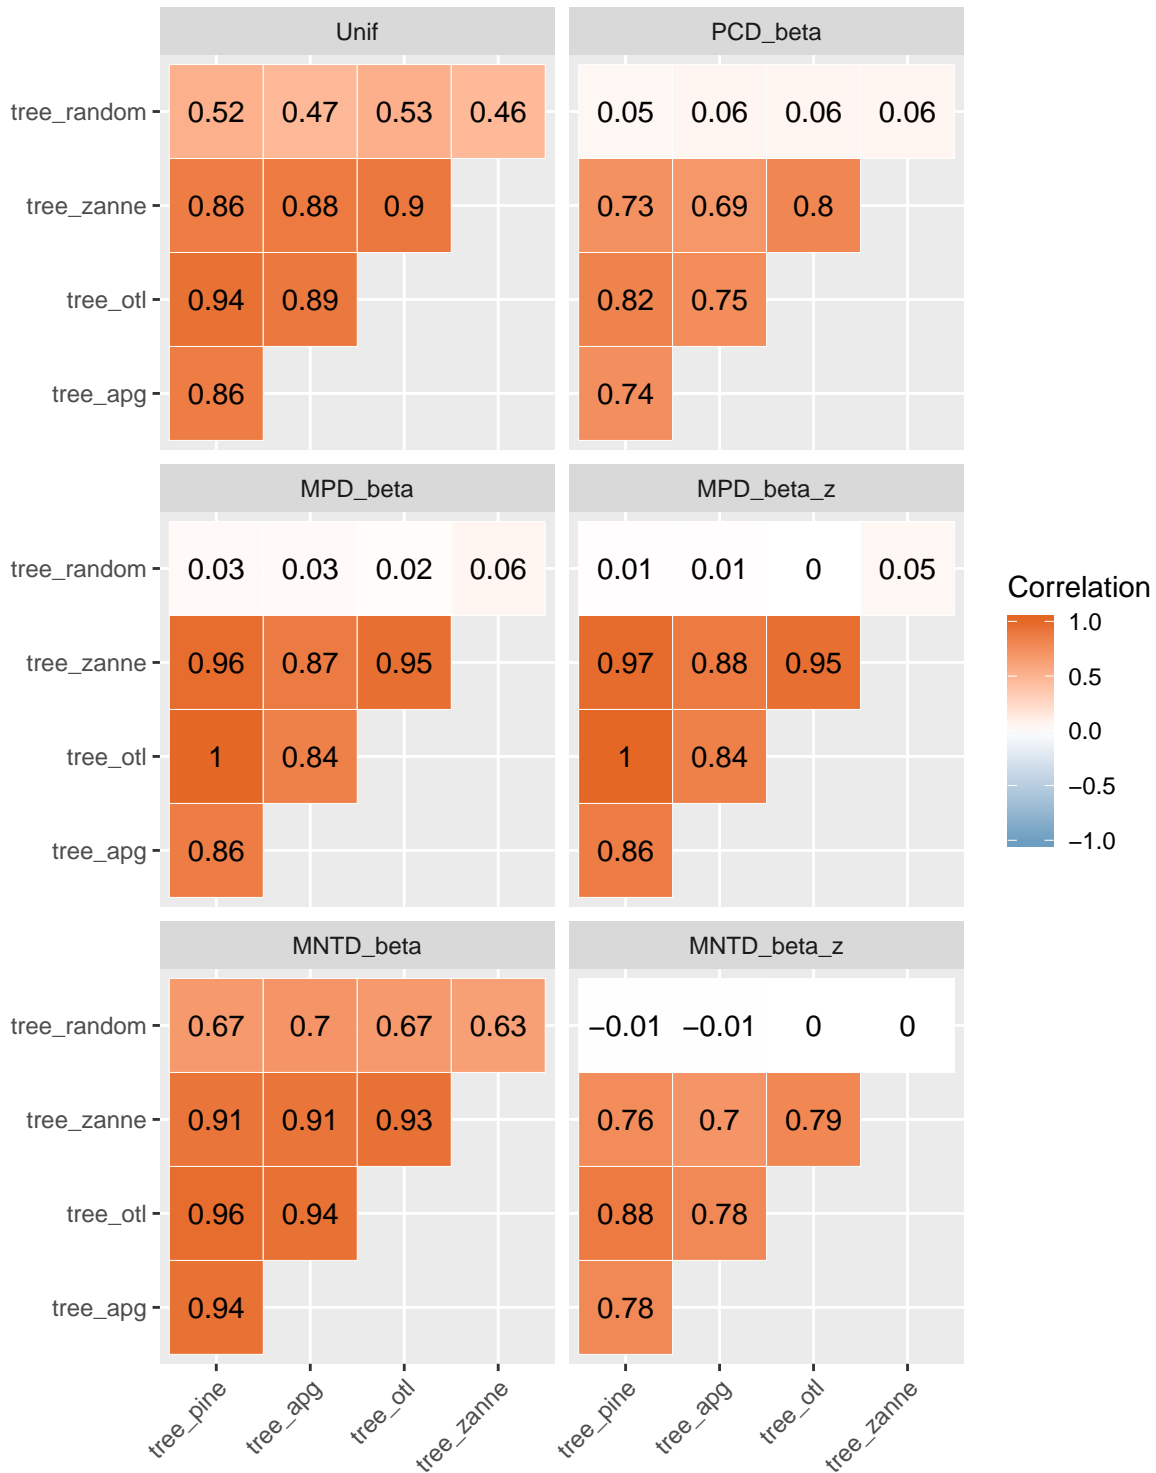

FIGURE A2: Median correlations of phylogenetic beta diversity values based on 100 simulations of the pine rockland dataset. Within each simulation, different sites have *different* species richness. Results are similar to those in the main text, where species richness was the same across all sites within each simulation to remove effects of species richness. Note that Unif and MNTD\_beta (but not MPD\_beta and PCD\_beta) are correlated with species beta diversity, thus the high correlations between tree\_random and other phylogenies. Null models successfully removed these correlations (MPD\_beta\_z and MNTD\_beta\_z).

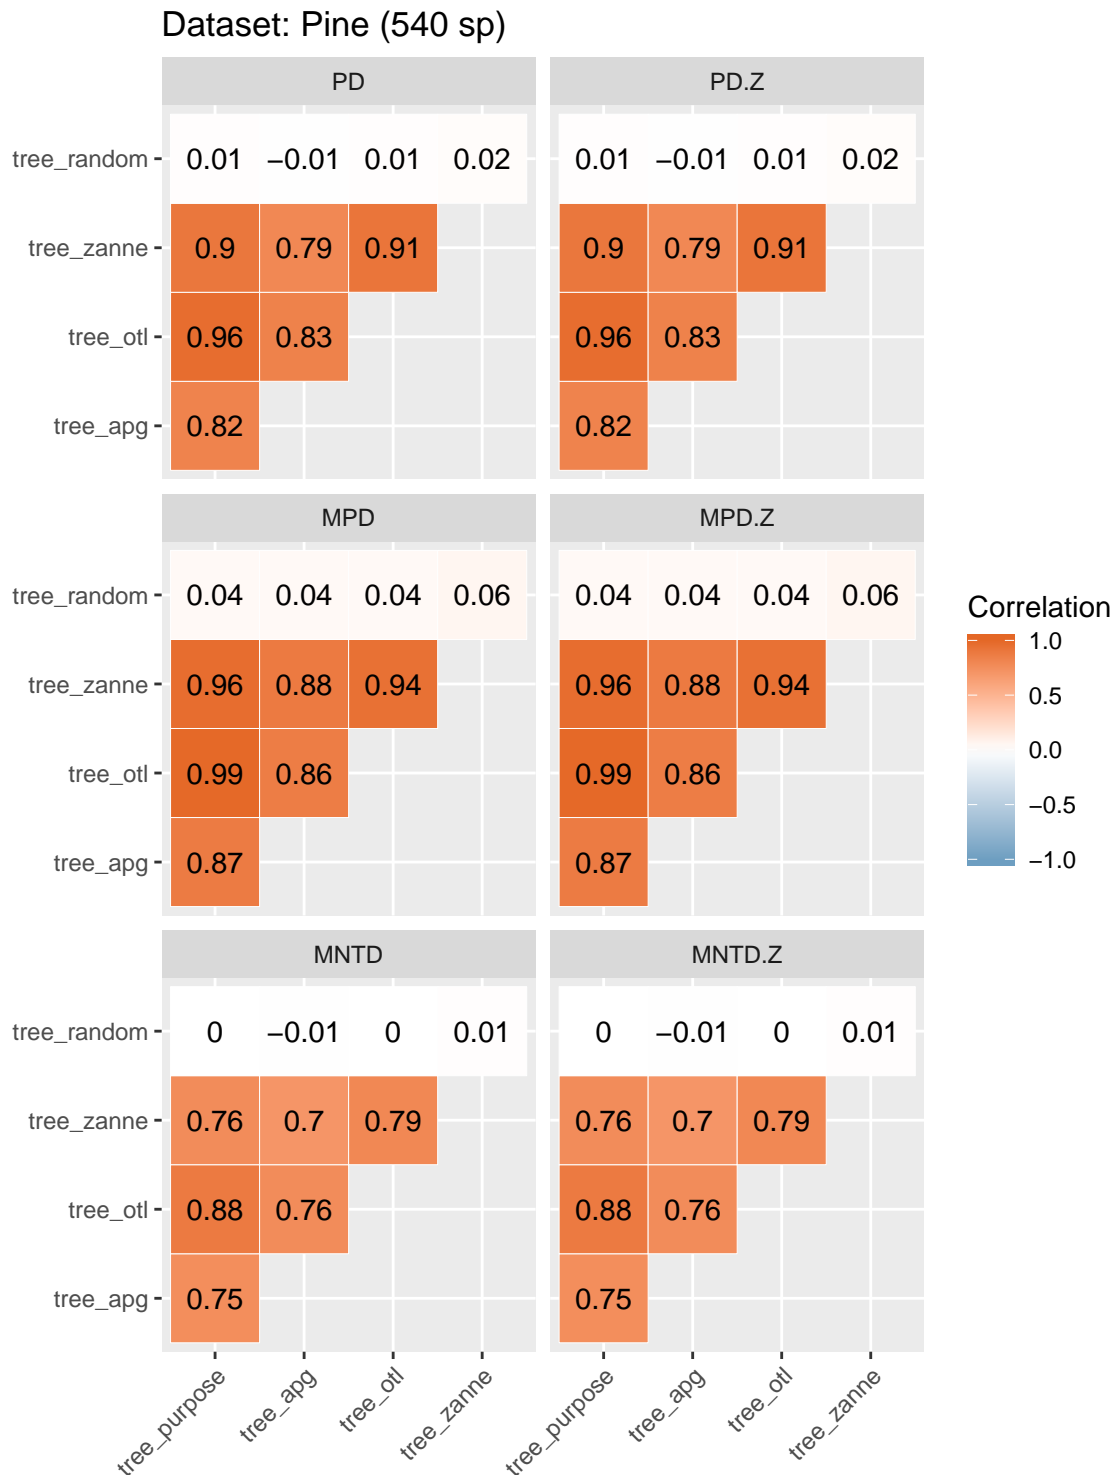

FIGURE A3: Correlations among observed phylogenetic alpha diversity values calculated from different phylogenies for the pine rockland dataset are the same as correlations among their corresponding standardized effect size (SES) calculated from different phylogenies.

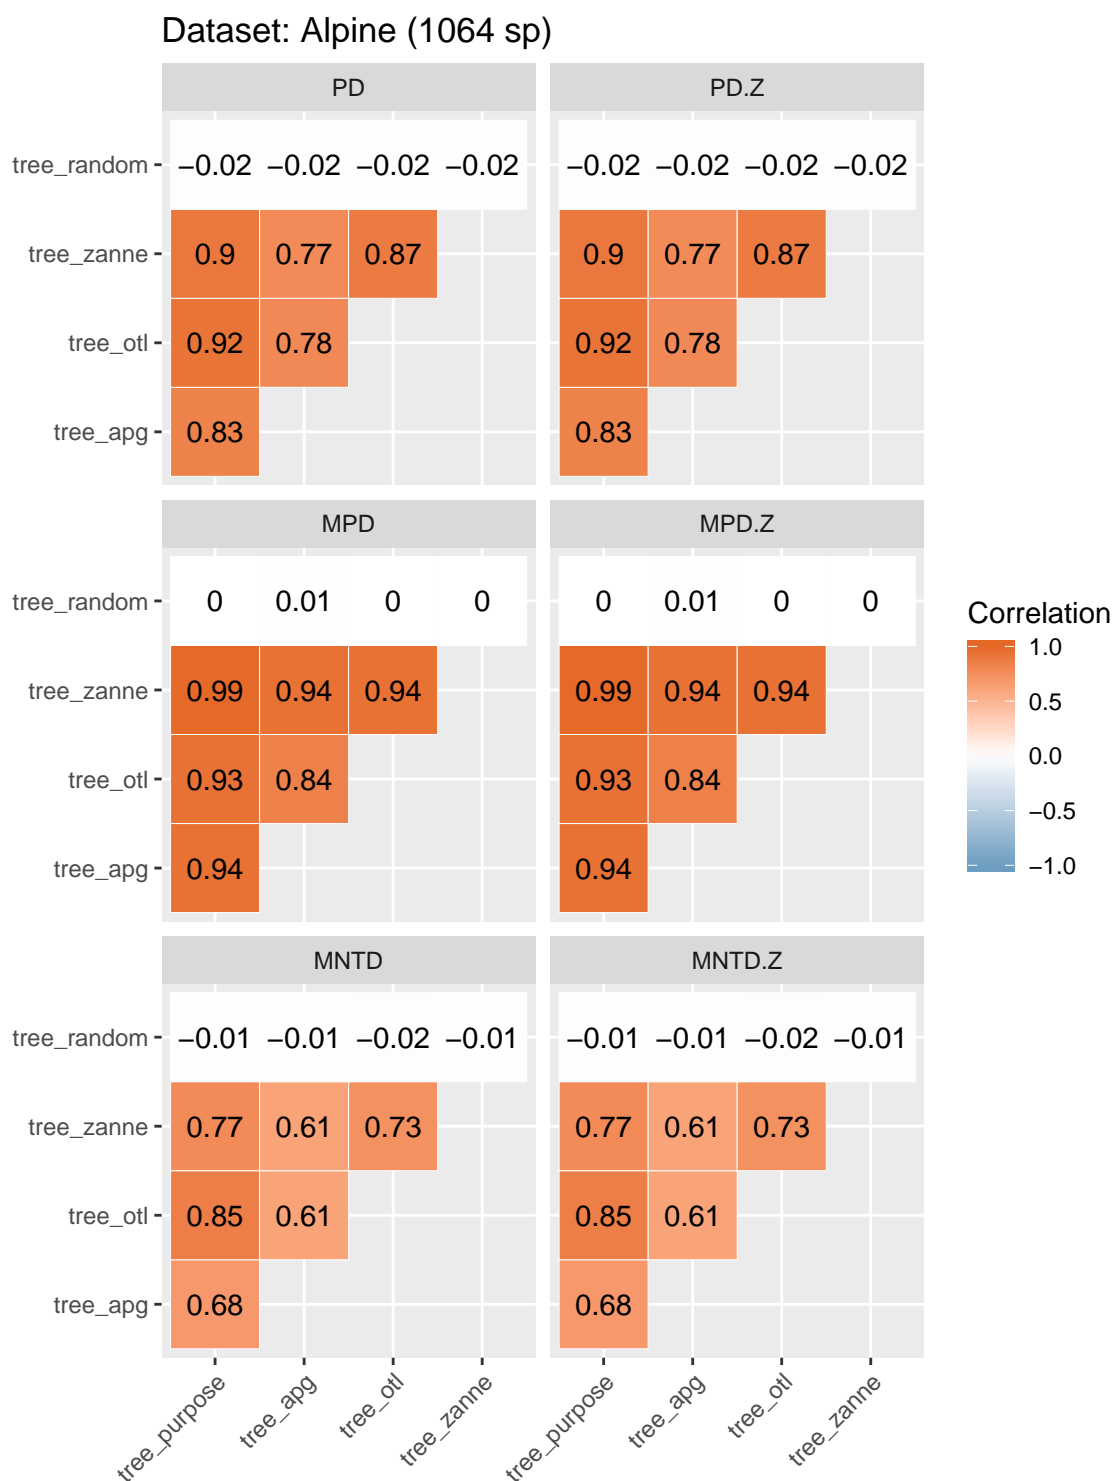

FIGURE A4: Correlations among observed phylogenetic alpha diversity values calculated from different phylogenies for the alpine dataset are the same as correlations among their corresponding standardized effect size (SES) calculated from different phylogenies.



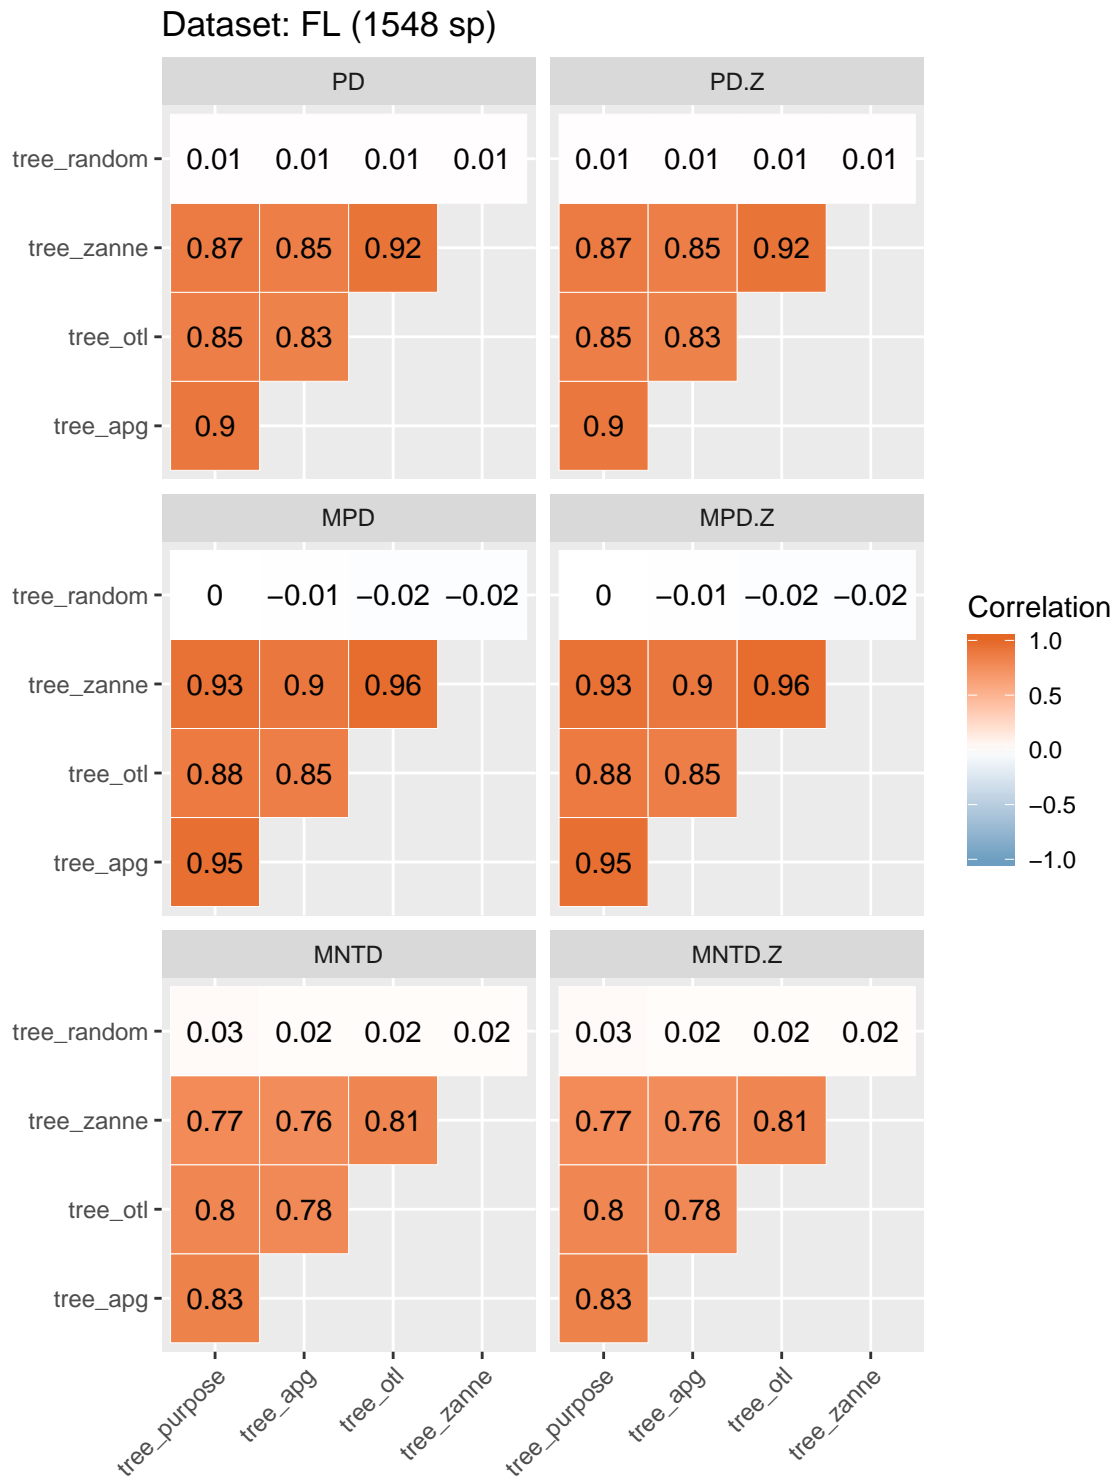

FIGURE A5: Correlations among observed phylogenetic alpha diversity values calculated from different phylogenies for the Florida flora dataset are the same as correlations among their corresponding standardized effect size (SES) calculated from different phylogenies.

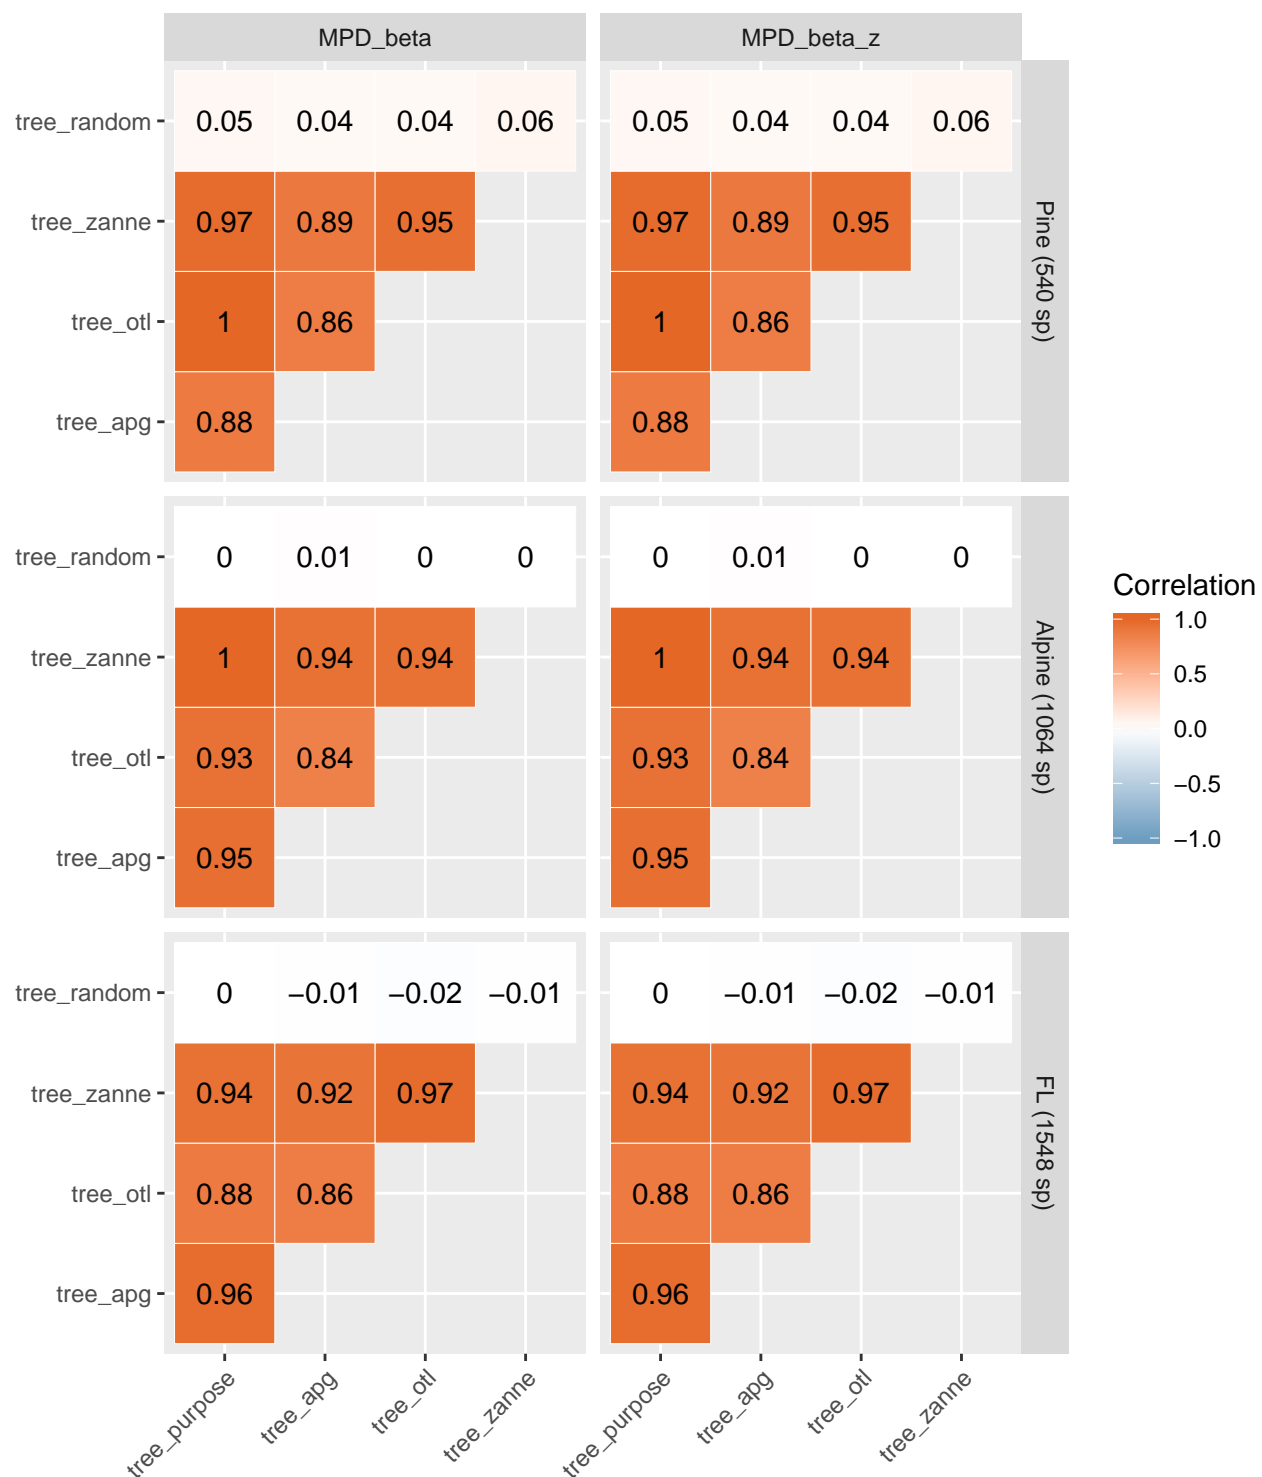

FIGURE A6: Correlations among observed phylogenetic beta diversity (MPD\_beta) values calculated from different phylogenies for all datasets are the same as correlations among their corresponding standardized effect size (SES, MPD\_beta\_z) calculated from different phylogenies.

## 82 **References**

- 83 APG IV et al. 2016. An update of the angiosperm phylogeny group classification for the orders and  
84 families of flowering plants: APG iv. - *Botanical Journal of the Linnean Society* 181: 1–20.
- 85 Bell, C. D. et al. 2010. The age and diversification of the angiosperms re-revisited. - *American*  
86 *journal of botany* 97: 1296–1303.
- 87 Bouckaert, R. et al. 2014. BEAST 2: A software platform for bayesian evolutionary analysis. - *PLoS*  
88 *computational biology* 10: e1003537.
- 89 Eastman, J. M. et al. 2013. Congruification: Support for time scaling large phylogenetic trees. -  
90 *Methods in Ecology and Evolution* 4: 688–691.
- 91 Gann GD, S. C. 2018. Floristic inventory of the florida keys database online. in press.
- 92 Katoh, K. and Standley, D. M. 2013. MAFFT multiple sequence alignment software version 7:  
93 Improvements in performance and usability. - *Molecular biology and evolution* 30: 772–780.
- 94 Kress, W. J. et al. 2009. Plant dna barcodes and a community phylogeny of a tropical forest  
95 dynamics plot in panama. - *Proceedings of the National Academy of Sciences* 106: 18621–18626.
- 96 Lanfear, R. et al. 2012. PartitionFinder: Combined selection of partitioning schemes and  
97 substitution models for phylogenetic analyses. - *Molecular biology and evolution* 29: 1695–1701.
- 98 Magallón, S. et al. 2013. Land plant evolutionary timeline: Gene effects are secondary to fossil  
99 constraints in relaxed clock estimation of age and substitution rates. - *American Journal of Botany*  
100 100: 556–573.
- 101 Marx, H. E. et al. 2017. Riders in the sky (islands): Using a mega-phylogenetic approach to  
102 understand plant species distribution and coexistence at the altitudinal limits of angiosperm plant  
103 life. - *Journal of biogeography* 44: 2618–2630.

104 Paradis, E. et al. 2004. APE: Analyses of phylogenetics and evolution in r language. -  
105 *Bioinformatics* 20: 289–290.

106 Pennell, M. W. et al. 2014. Geiger v2. 0: An expanded suite of methods for fitting  
107 macroevolutionary models to phylogenetic trees. - *Bioinformatics* 30: 2216–2218.

108 Ronquist, F. et al. 2012. MrBayes 3.2: Efficient bayesian phylogenetic inference and model choice  
109 across a large model space. - *Systematic biology* 61: 539–542.

110 Sanderson, M. J. 2003. R8s: Inferring absolute rates of molecular evolution and divergence times in  
111 the absence of a molecular clock. - *Bioinformatics* 19: 301–302.

112 Schneider, H. et al. 2016. A community-derived classification for extant lycophytes and ferns. 54:  
113 563–603.

114 Schuettpelz, E. and Pryer, K. M. 2009. Evidence for a cenozoic radiation of ferns in an  
115 angiosperm-dominated canopy. - *Proceedings of the National Academy of Sciences* 106:  
116 11200–11205.

117 Smith, S. A. and Dunn, C. W. 2008. Phyutility: A phyloinformatics tool for trees, alignments and  
118 molecular data. - *Bioinformatics* 24: 715–716.

119 Smith, S. A. and O’Meara, B. C. 2012. TreePL: Divergence time estimation using penalized  
120 likelihood for large phylogenies. - *Bioinformatics* 28: 2689–2690.

121 Smith, S. A. et al. 2009. Mega-phylogeny approach for comparative biology: An alternative to  
122 supertree and supermatrix approaches. - *BMC evolutionary biology* 9: 37.

123 Soltis, D. E. et al. 2011. Angiosperm phylogeny: 17 genes, 640 taxa. - *American journal of botany*  
124 98: 704–730.

125 Stamatakis, A. 2014. RAxML version 8: A tool for phylogenetic analysis and post-analysis of large  
126 phylogenies. - *Bioinformatics* 30: 1312–1313.

- <sup>127</sup> Suyama, M. et al. 2006. PAL2NAL: Robust conversion of protein sequence alignments into the  
<sup>128</sup> corresponding codon alignments. - *Nucleic acids research* 34: W609–W612.
- <sup>129</sup> Trotta, L. et al. 2018. Community phylogeny of the globally critically imperiled pine rockland  
<sup>130</sup> ecosystem. - *American journal of botany* in press.
- <sup>131</sup> Zanne, A. E. et al. 2014. Three keys to the radiation of angiosperms into freezing environments. -  
<sup>132</sup> *Nature* 506: 89–92.
