# Supplementary material for: For common community phylogenetic analyses, go ahead and use synthesis phylogenies
Source: bioRxiv or medRxiv preprint supplement (doi:10.1101/370353), 2019-05-06
Supplement: Supplementary file [file 370353-1.pdf]

# Appendix

27 September, 2018

## Text A1: details about the three purpose-built phylogenies used

### Pine Rockland community phylogeny

The pine rockland community phylogeny was constructed from a combination of field and herbarium based collections and supplemented with pre-existing sequences from the Flora of Florida project at the University of Florida. The Floristic Inventory of South Florida (FISF), which includes a comprehensive list of pine rockland species (n = 592, Gann GD 2018), guided our sampling efforts. Specimens were collected in fruit or flower over the course of all seasons and across multiple pine rockland fragments in Miami Dade County from 2014 to 2016. We collected material from 331 new field collections, 17 herbarium collections at Fairchild Tropical Botanic Garden (FTBG; Miami, FL, USA) or the University of Florida (FLAS; Gainesville, FL, USA), and field-collected plants currently in cultivation at Fairchild Tropical Botanic Garden. For field and herbarium collections, we extracted total genomic DNA and amplified three commonly used plastid barcodes (Kress et al. 2009): *rbcL*, *matK*, and *psbA-trnH*. Amplification success was confirmed with gel electrophoresis and Sanger sequencing was performed by Beckman Coulter Genomics (Cambridge, Massachusetts, USA), Genewiz (South Plainfield, New Jersey, USA), or Eurofins Genomics (Louisville, Kentucky, USA). In all, we were able to include 540 taxa in our community phylogeny, 90.88% of all vascular plants that occur on the FISF species list.

21 Both newly generated and pre-existing sequences were edited and assembled using Geneious R9  
22 (Biomatters, Auckland, New Zealand), and resulting alignments were constructed using the  
23 MAFFT v1.3.5 (Kato and Standley 2013) plugin in Geneious. We visually inspected individual  
24 alignments before concatenating all three loci into a final alignment. We used PartitionFinder  
25 v1.1.1 (Lanfear et al. 2012) and the Akaike information criterion (AIC) to determine the optimal  
26 model of evolution for each barcode as well as the best overall partitioning scheme, which were  
27 used for all down stream Maximum likelihood (ML) and Bayesian Inference (BI) analyses. We  
28 conducted all analyses on the HiPerGator 2.0 supercomputing cluster at the University of Florida.  
29 ML analysis was performed in RAxML v8.2.8 (Stamatakis 2014) with an ordinal level topological  
30 constraint, following the Angiosperm Phylogeny Group IV (APG IV et al. 2016) for flowering  
31 plants and the Pteridophyte Phylogeny Group (Schneider et al. 2016) for ferns and lycophytes. One  
32 thousand bootstrap replicates were used to determined clade support. We used a single lycophyte  
33 species (*Selaginella eatonii*) as the outgroup. Dating analysis was performed in BEAST 2.4.6  
34 (Bouckaert et al. 2014). Our BEAST analysis included nine fossil constraints selected from previous  
35 molecular dating studies in addition to ordinal and superclade constraints sensu APG IV  
36 (Schuettpelez and Pryer 2009, Bell et al. 2010, Magallón et al. 2013, APG IV et al. 2016). The tree  
37 topology that resulted from our ML search was used as the starting tree for this analysis after it  
38 was calibrated to match the fossil constraints using the chronos function in the R package ape  
39 (Paradis et al. 2004). More details about all included analyses can be found in Trotta et al. (2018).

## 40 **Alpine community phylogeny**

41 For each of the species occurring in the Écrins National Park, France (n = 1,345), we used the  
42 PHLAWD pipeline (Smith et al. 2009) to retrieve sequence data for five gene regions (*atpB*, *rbcL*,  
43 *matK*, *trnTLF*, and *ITS*) from GenBank (release 209). Sites that were missing across >50% of the taxa  
44 in the output alignment were removed from each gene region using PHYUTILITY (Smith and  
45 Dunn 2008), and maximum likelihood (ML) inference implemented in RAxML (Stamatakis 2014)

46 was used to estimate gene trees. Outlier taxa (i.e. those falling outside of clades defined by the APG  
47 III taxonomy) were identified by visual inspection of each gene tree and were removed before  
48 concatenation into a final alignment using PHYUTILITY (Smith and Dunn 2008). The resulting  
49 super-matrix consisted of 79% (n = 1,065) of the species surveyed and was used to estimate a ML  
50 community phylogeny of the Écrins flora in RAxML v8.0.4, under a GTR-CAT model of nucleotide  
51 evolution with simultaneous rapid bootstrap and ML search using 999 replicates, which is ideal for  
52 large nucleotide alignments (Stamatakis 2014). We used the ‘congruification’ approach (Eastman et  
53 al. 2013) to map divergence times from a reference time-tree (Soltis et al. 2011, Zanne et al. 2014)  
54 with concordant nodes on the best ML estimate of tree topology in the R package *geiger* v2.0.6  
55 (Pennell et al. 2014), and the phylogeny was scaled to time using *treePL* (Smith and O’Meara 2012).  
56 Further details can be found in Marx et al. (2017).

## 57 **Florida Flora phylogeny**

58 We constructed a phylogeny for the vascular flora of Florida based on sequence data of two plastid  
59 genes commonly used in plant phylogenetics: *rbcL* and *matK*. We first leveraged existing published  
60 sequence data on GenBank. We obtained sequence data from GenBank for 463 species. We  
61 checked these sequences throughout the alignment and tree-building process and removed  
62 problematic sequences. The remaining species lacked published DNA sequence data. We thus  
63 collected fresh materials of these species and sequenced them and deposited voucher specimens at  
64 the University of Florida herbarium (FLAS). For rare and hard-to-access species, we sampled  
65 specimens from FLAS. We aligned sequences of *rbcL* and *matK* according to a reference  
66 protein-coding sequence using Pal2Nal (Suyama et al. 2006). We used PartitionFinder v1.1.1 and  
67 AIC (Lanfear et al. 2012) to determine the optimal model of evolution. We then ran RAxML v7.03  
68 (Stamatakis 2014) on the partitioned dataset. We used 100 bootstrap replicates to determine the  
69 internal support for the initial tree evaluation. We used three outgroup taxa using data from  
70 GenBank: *Physcomitrella patens* (Funariaceae), *Syntrichia ruralis* (Pottiaceae), and *Mastigophora*

71 *woodsii* (Mastigophoraceae). We examined all phylogenetic trees for issues including possible  
72 misidentifications of species, contaminants, and misplaced taxa. We used the best tree from  
73 RAxML as a starting tree in a Bayesian analysis using MrBayes v3.2.2 (Ronquist et al. 2012) for  $10^6$   
74 generations with 20 independent runs. The top 10 trees were sampled based on likelihood score as  
75 representations of the posterior distribution of trees. We used the tree with the highest likelihood  
76 in this study. We dated the tree, producing a chronogram, using r8s (Sanderson 2003) and 17  
77 calibration points with a maximum age of 377 million years. More details about the phylogeny  
78 building process can be found in Allen et al. (*in revision*).

## 79 **Figures**

Median correlation based on 100 simulations; dataset pine rockland

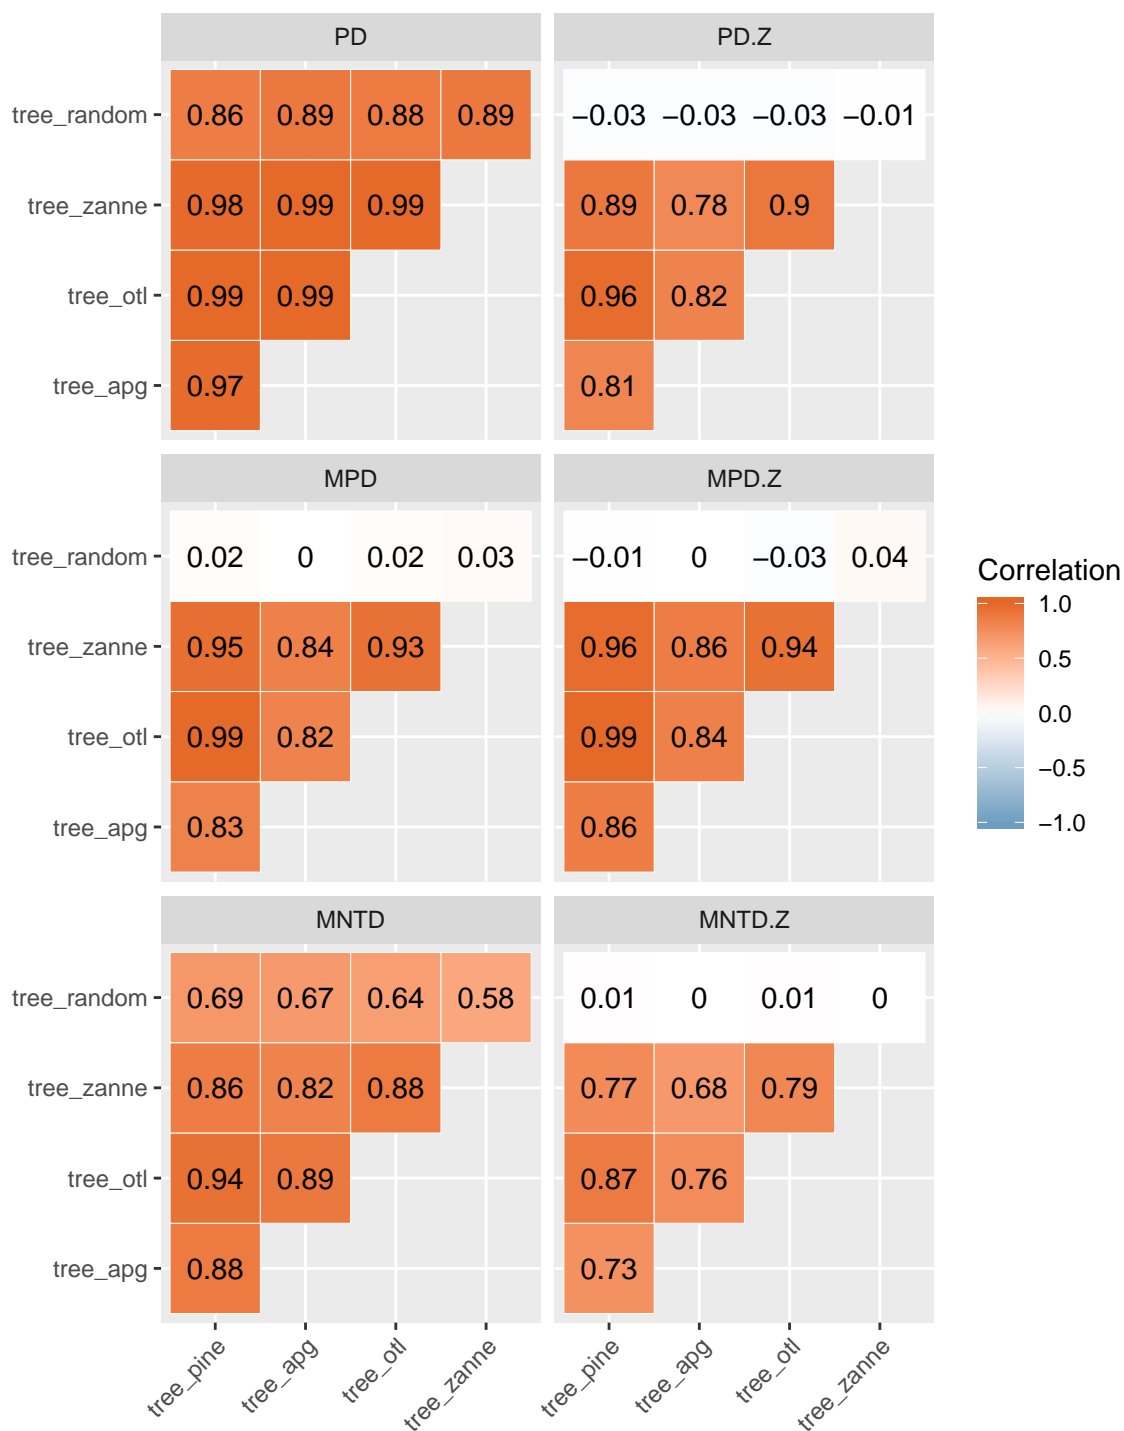

FIGURE A1: Median correlations of phylogenetic alpha diversity values based on 100 simulations of the pine rockland dataset. Within each simulation, different sites have *different* species richness. Results are similar to those in the main text, where species richness was the same across all sites within each simulation to remove effects of species richness. Note that PD and MNTD (but not MPD) are correlated with species richness, thus the high correlations between tree\_random and other phylogenies. Null models successfully removed these correlations (PD.Z and MNTD.Z).

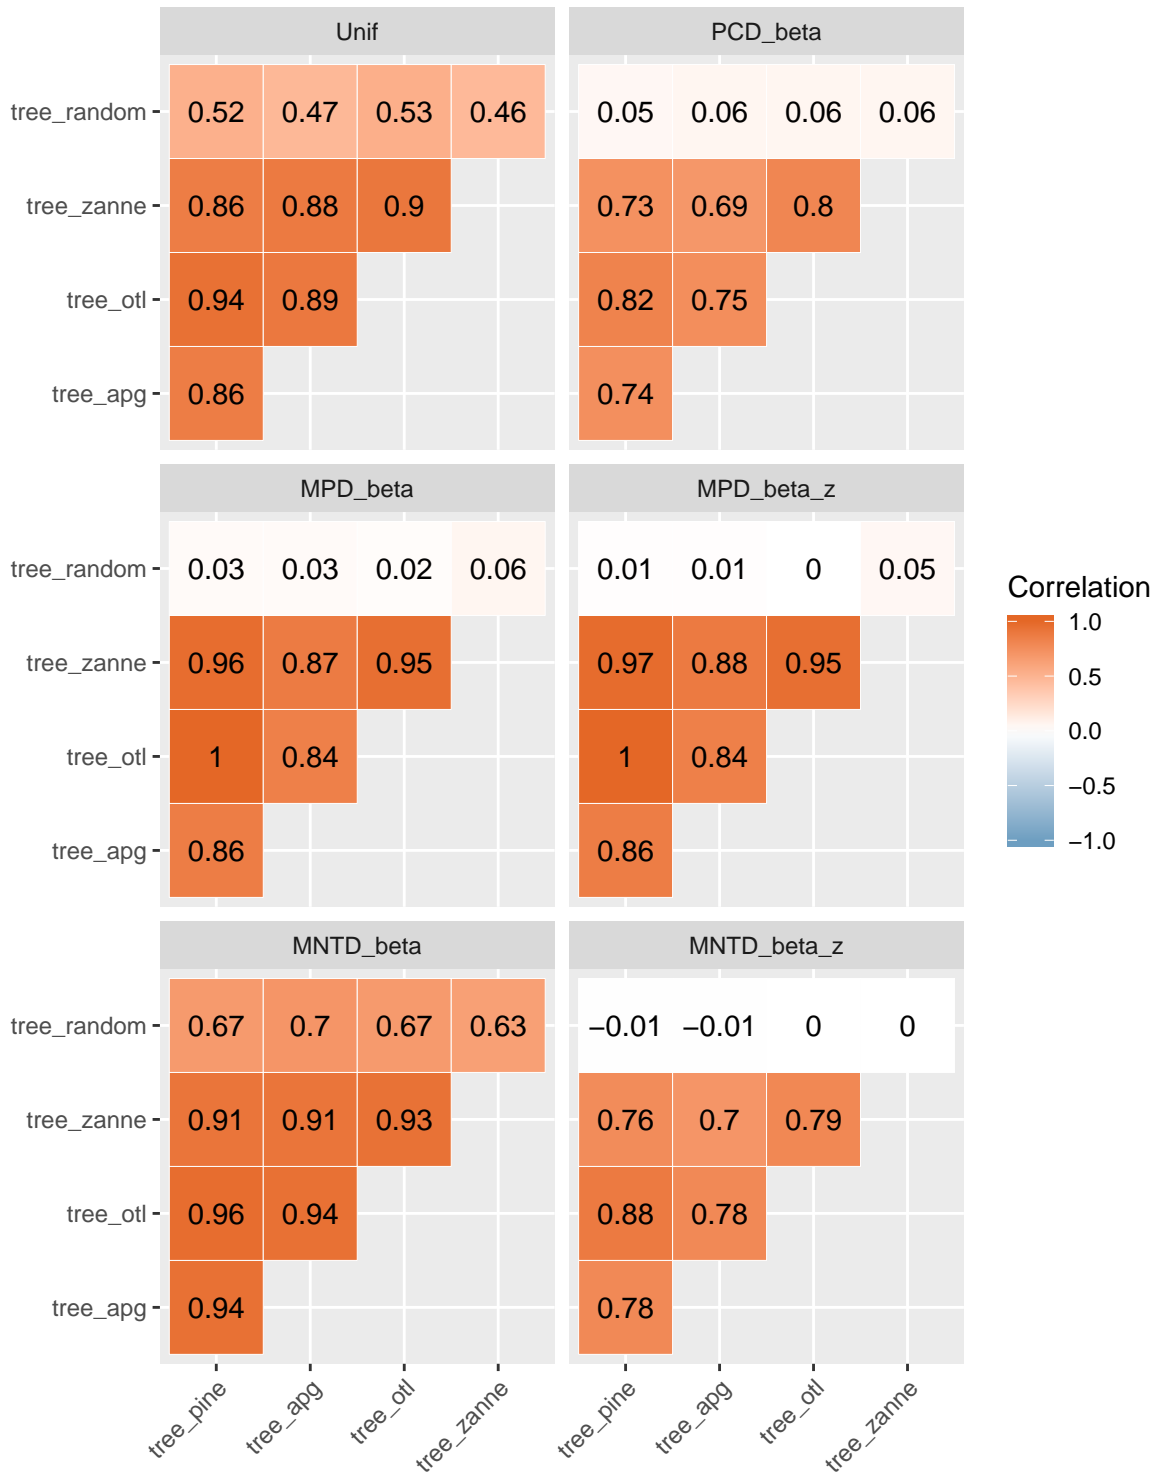

FIGURE A2: Median correlations of phylogenetic beta diversity values based on 100 simulations of the pine rockland dataset. Within each simulation, different sites have *different* species richness. Results are similar to those in the main text, where species richness was the same across all sites within each simulation to remove effects of species richness. Note that Unif and MNTD\_beta (but not MPD\_beta and PCD\_beta) are correlated with species beta diversity, thus the high correlations between tree\_random and other phylogenies. Null models successfully removed these correlations (MPD\_beta\_z and MNTD\_beta\_z).

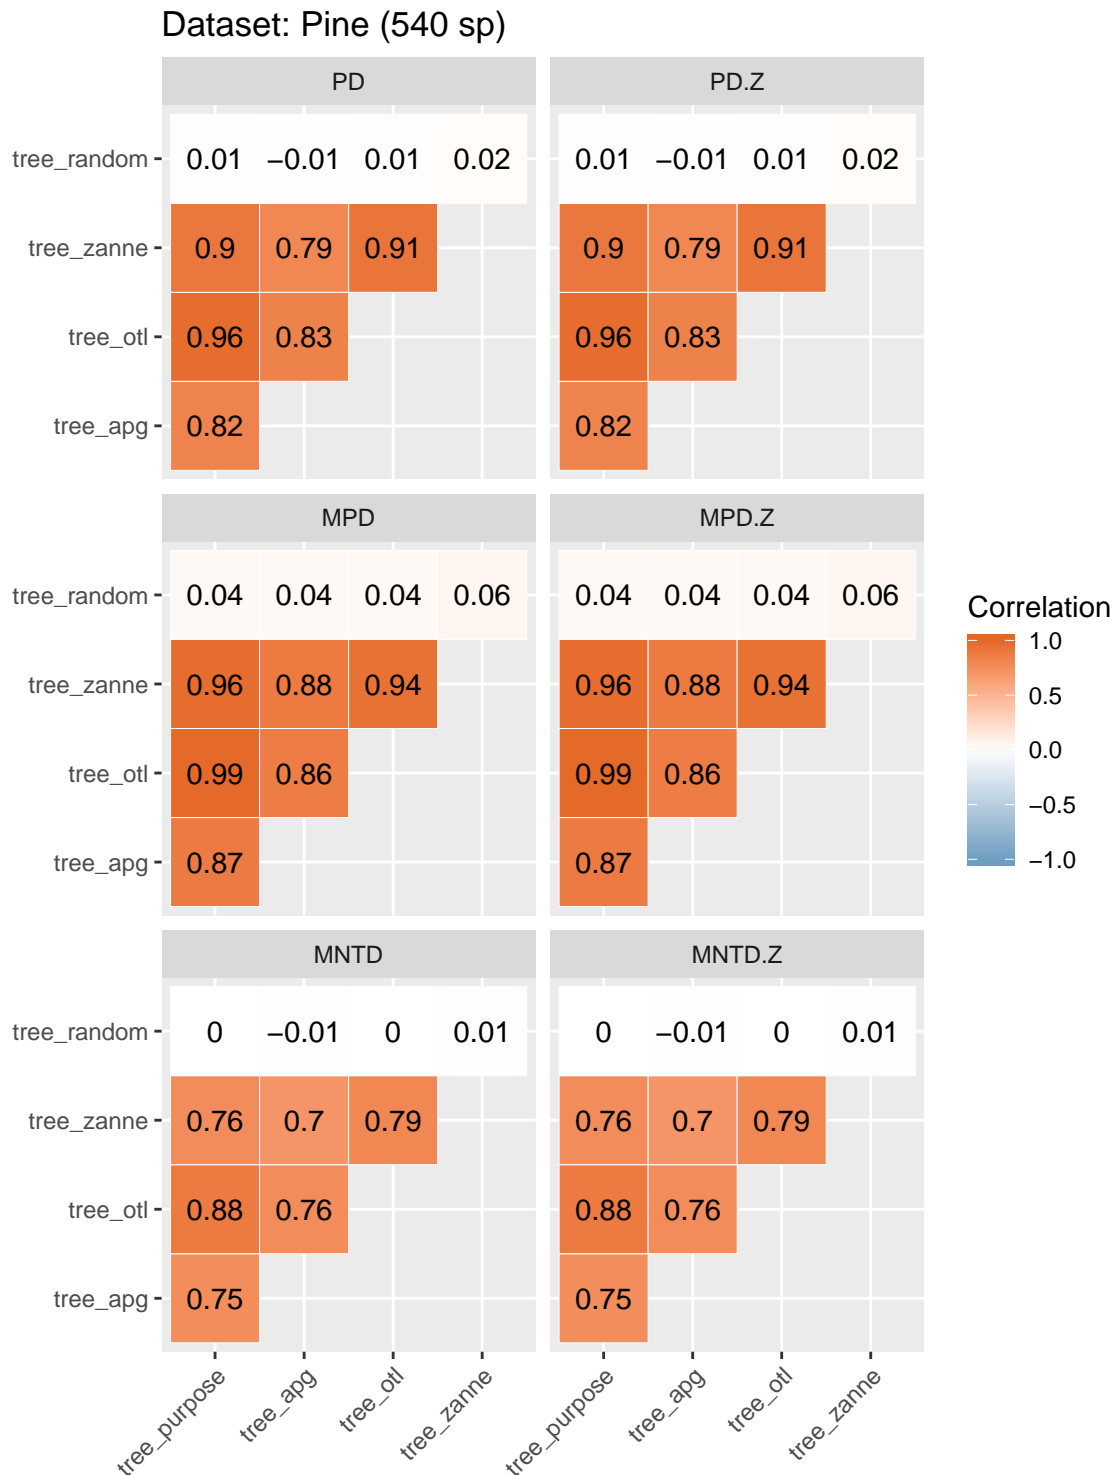

FIGURE A3: Correlations among observed phylogenetic alpha diversity values calculated from different phylogenies for the pine rockland dataset are the same as correlations among their corresponding standardized effect size (SES) calculated from different phylogenies.

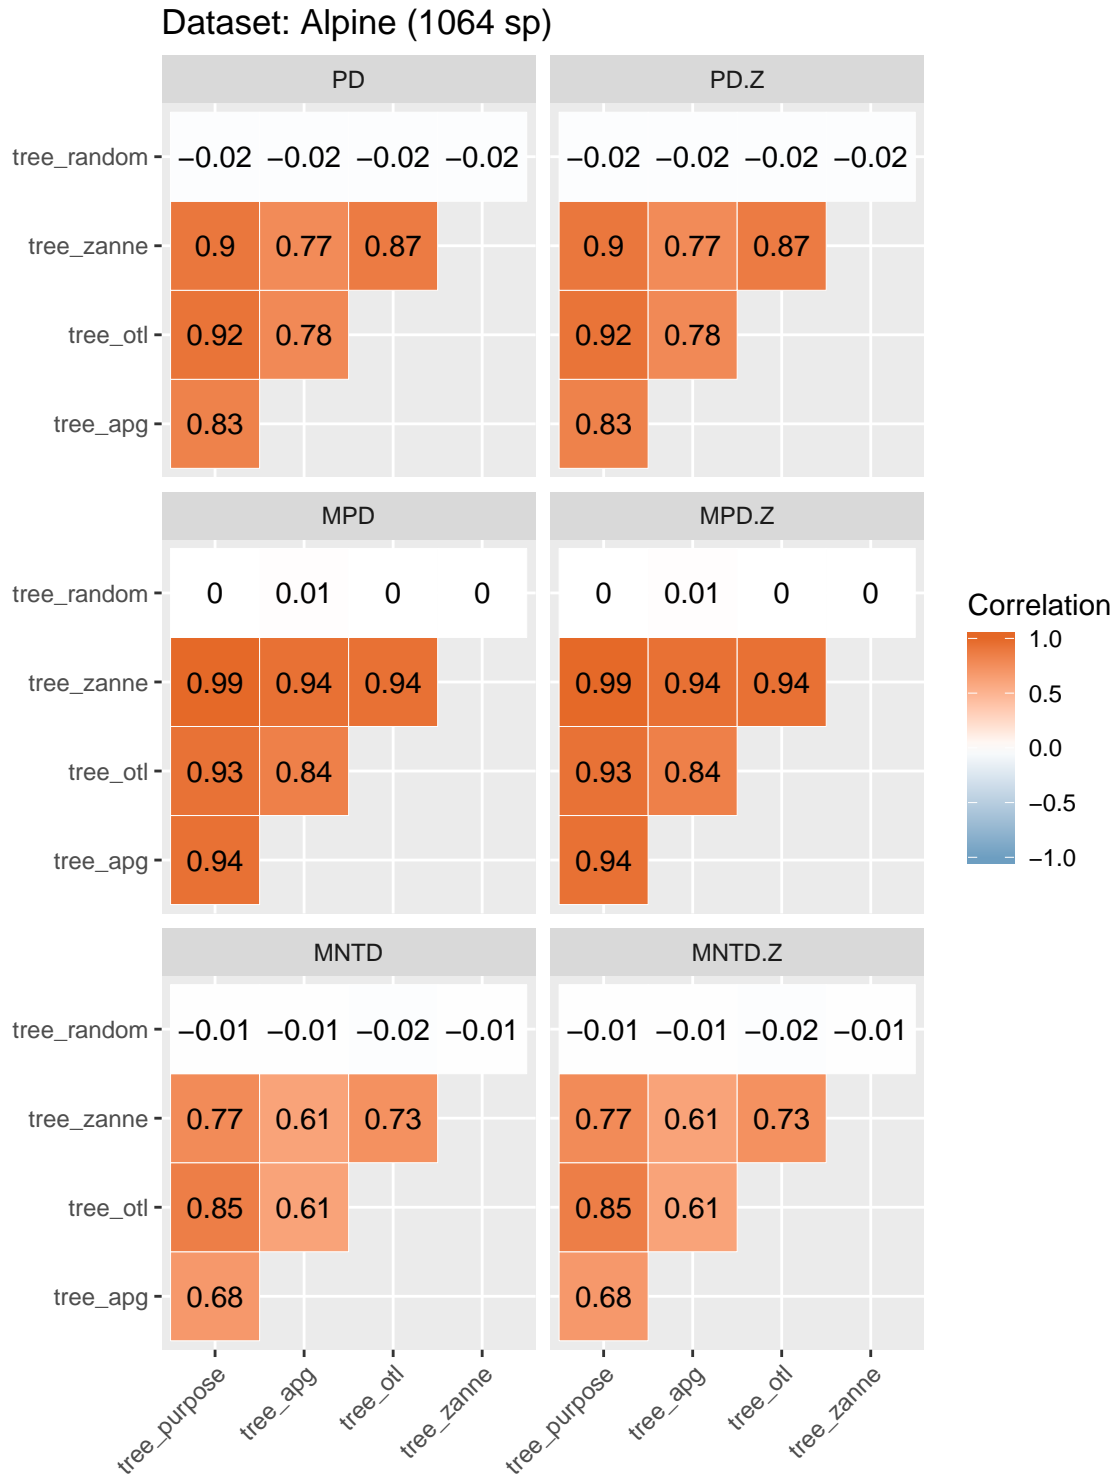

FIGURE A4: Correlations among observed phylogenetic alpha diversity values calculated from different phylogenies for the alpine dataset are the same as correlations among their corresponding standardized effect size (SES) calculated from different phylogenies.



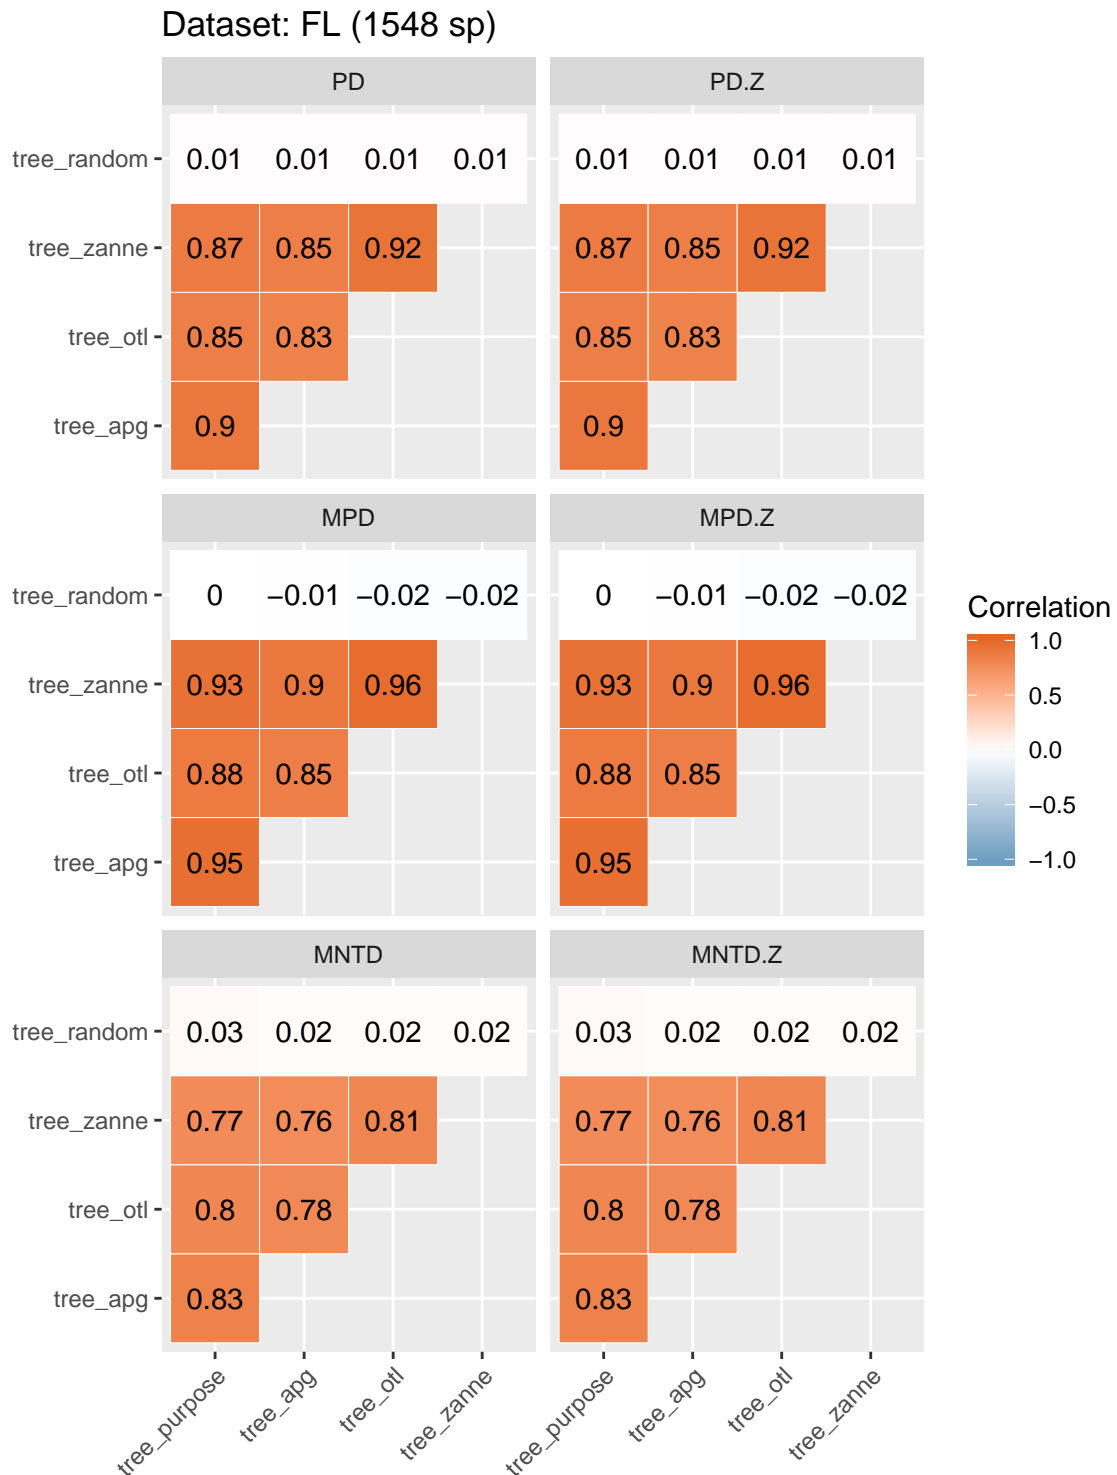

FIGURE A5: Correlations among observed phylogenetic alpha diversity values calculated from different phylogenies for the Florida flora dataset are the same as correlations among their corresponding standardized effect size (SES) calculated from different phylogenies.

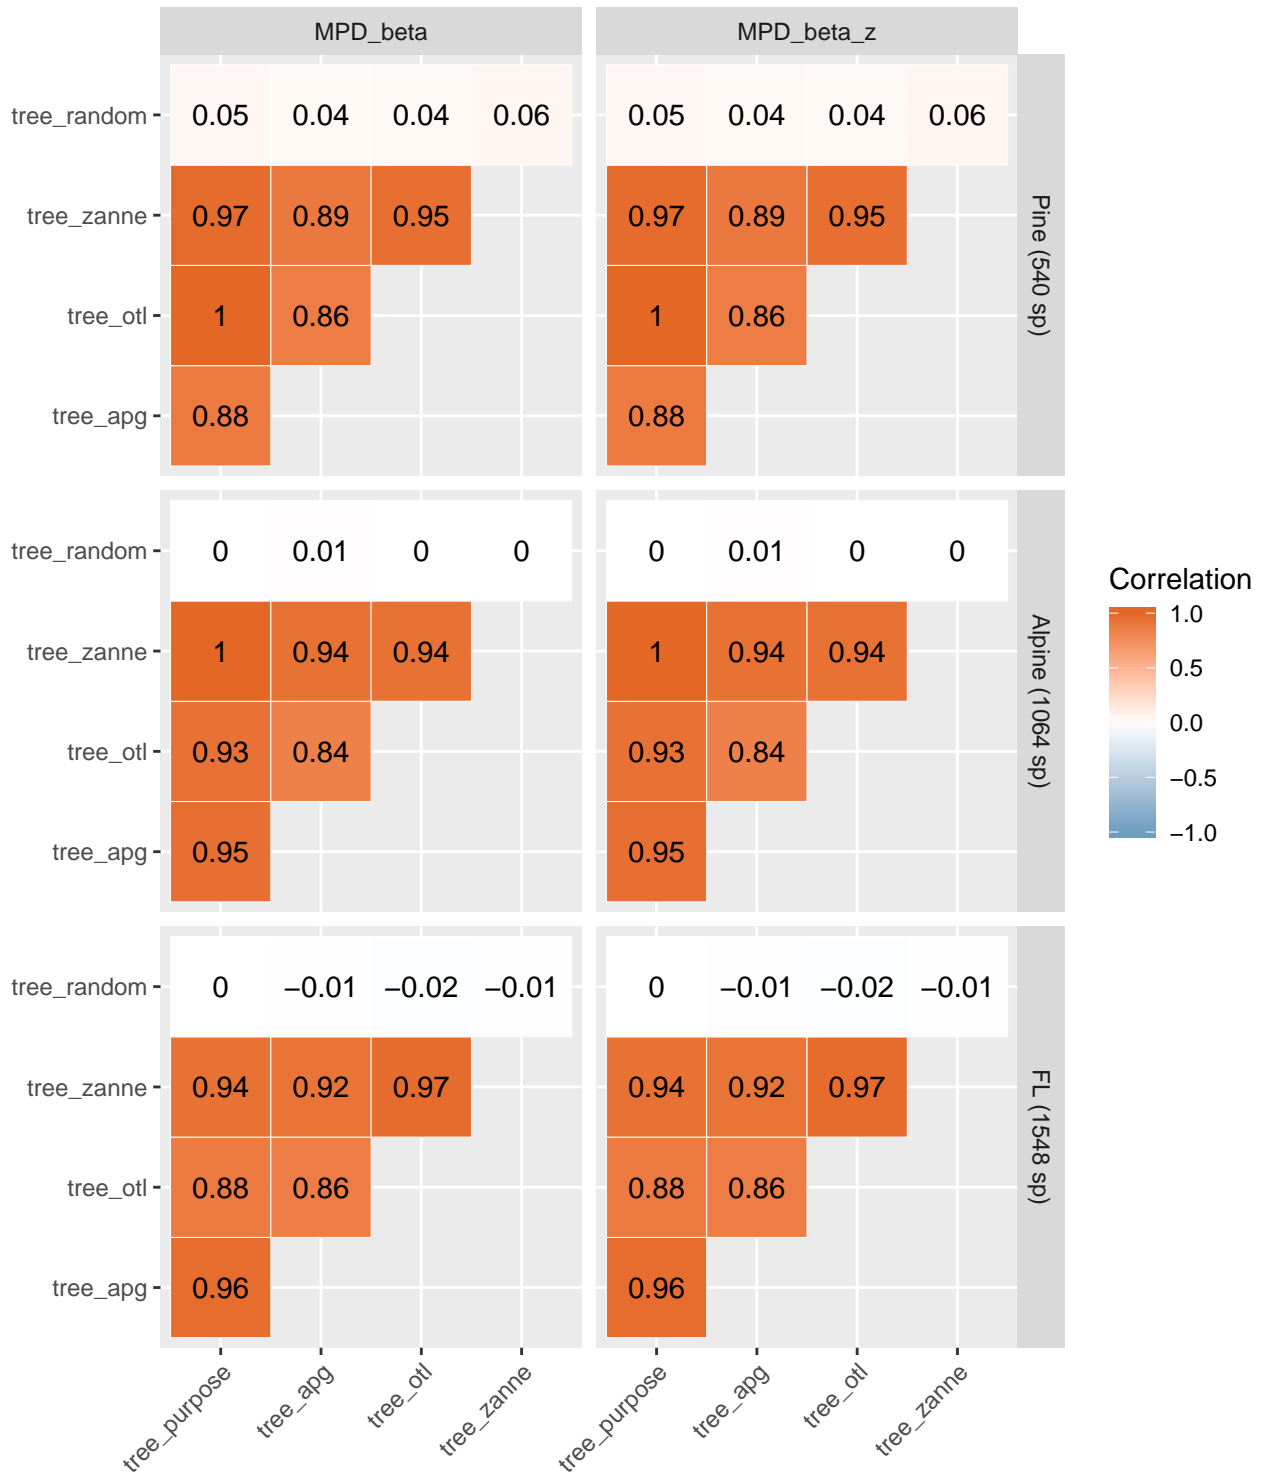

FIGURE A6: Correlations among observed phylogenetic beta diversity (MPD\_beta) values calculated from different phylogenies for all datasets are the same as correlations among their corresponding standardized effect size (SES, MPD\_beta\_z) calculated from different phylogenies.

## 80 **References**

- 81 APG IV et al. 2016. An update of the angiosperm phylogeny group classification for the orders and  
82 families of flowering plants: APG iv. - *Botanical Journal of the Linnean Society* 181: 1–20.
- 83 Bell, C. D. et al. 2010. The age and diversification of the angiosperms re-revisited. - *American*  
84 *journal of botany* 97: 1296–1303.
- 85 Bouckaert, R. et al. 2014. BEAST 2: A software platform for bayesian evolutionary analysis. - *PLoS*  
86 *computational biology* 10: e1003537.
- 87 Eastman, J. M. et al. 2013. Congruification: Support for time scaling large phylogenetic trees. -  
88 *Methods in Ecology and Evolution* 4: 688–691.
- 89 Gann GD, S. C. 2018. Floristic inventory of the florida keys database online. in press.
- 90 Katoh, K. and Standley, D. M. 2013. MAFFT multiple sequence alignment software version 7:  
91 Improvements in performance and usability. - *Molecular biology and evolution* 30: 772–780.
- 92 Kress, W. J. et al. 2009. Plant dna barcodes and a community phylogeny of a tropical forest  
93 dynamics plot in panama. - *Proceedings of the National Academy of Sciences* 106: 18621–18626.
- 94 Lanfear, R. et al. 2012. PartitionFinder: Combined selection of partitioning schemes and  
95 substitution models for phylogenetic analyses. - *Molecular biology and evolution* 29: 1695–1701.
- 96 Magallón, S. et al. 2013. Land plant evolutionary timeline: Gene effects are secondary to fossil  
97 constraints in relaxed clock estimation of age and substitution rates. - *American Journal of Botany*  
98 100: 556–573.
- 99 Marx, H. E. et al. 2017. Riders in the sky (islands): Using a mega-phylogenetic approach to  
100 understand plant species distribution and coexistence at the altitudinal limits of angiosperm plant  
101 life. - *Journal of biogeography* 44: 2618–2630.

102 Paradis, E. et al. 2004. APE: Analyses of phylogenetics and evolution in r language. -  
103 *Bioinformatics* 20: 289–290.

104 Pennell, M. W. et al. 2014. Geiger v2. 0: An expanded suite of methods for fitting  
105 macroevolutionary models to phylogenetic trees. - *Bioinformatics* 30: 2216–2218.

106 Ronquist, F. et al. 2012. MrBayes 3.2: Efficient bayesian phylogenetic inference and model choice  
107 across a large model space. - *Systematic biology* 61: 539–542.

108 Sanderson, M. J. 2003. R8s: Inferring absolute rates of molecular evolution and divergence times in  
109 the absence of a molecular clock. - *Bioinformatics* 19: 301–302.

110 Schneider, H. et al. 2016. A community-derived classification for extant lycophytes and ferns. 54:  
111 563–603.

112 Schuettpelz, E. and Pryer, K. M. 2009. Evidence for a cenozoic radiation of ferns in an  
113 angiosperm-dominated canopy. - *Proceedings of the National Academy of Sciences* 106:  
114 11200–11205.

115 Smith, S. A. and Dunn, C. W. 2008. Phyutility: A phyloinformatics tool for trees, alignments and  
116 molecular data. - *Bioinformatics* 24: 715–716.

117 Smith, S. A. and O’Meara, B. C. 2012. TreePL: Divergence time estimation using penalized  
118 likelihood for large phylogenies. - *Bioinformatics* 28: 2689–2690.

119 Smith, S. A. et al. 2009. Mega-phylogeny approach for comparative biology: An alternative to  
120 supertree and supermatrix approaches. - *BMC evolutionary biology* 9: 37.

121 Soltis, D. E. et al. 2011. Angiosperm phylogeny: 17 genes, 640 taxa. - *American journal of botany*  
122 98: 704–730.

123 Stamatakis, A. 2014. RAxML version 8: A tool for phylogenetic analysis and post-analysis of large  
124 phylogenies. - *Bioinformatics* 30: 1312–1313.

- <sup>125</sup> Suyama, M. et al. 2006. PAL2NAL: Robust conversion of protein sequence alignments into the  
<sup>126</sup> corresponding codon alignments. - *Nucleic acids research* 34: W609–W612.
- <sup>127</sup> Trotta, L. et al. 2018. Community phylogeny of the globally critically imperiled pine rockland  
<sup>128</sup> ecosystem. - *American journal of botany* in press.
- <sup>129</sup> Zanne, A. E. et al. 2014. Three keys to the radiation of angiosperms into freezing environments. -  
<sup>130</sup> *Nature* 506: 89–92.
